# Supplementary material for: Synthesis and ex vivo biological evaluation of gallium-68 labelled NODAGA chelates assessing cardiac uptake and retention
Source: Royal Society of Chemistry journal article supplement (doi:10.1039/d1dt02224e), 2021-01-01
Supplement: d1dt02224e1.pdf [file d1dt02224e1.pdf]

## Synthesis and *Ex Vivo* Biological Evaluation of Gallium-68 Labelled NODAGA Chelates Assessing Cardiac Uptake and Retention

### Supporting Information

Bradley E. Osborne,<sup>†,‡</sup> Thomas T. C. Yue,<sup>†</sup> Edward C. T. Waters,<sup>‡</sup> Friedrich Baark,<sup>‡</sup> Richard Southworth,<sup>\*,‡</sup> Nicholas J. Long<sup>\*,†</sup>

<sup>†</sup>*Department of Chemistry, Imperial College London, Molecular Sciences Research Hub, White City Campus, Wood Lane, London, W12 0BZ, U.K.*

<sup>‡</sup>*Division of Imaging Sciences and Biomedical Imaging, St. Thomas' Hospital, King's College London, London, SE1 7EH, U.K.*

## Contents

|                                                                                                                                                                                                  |    |
|--------------------------------------------------------------------------------------------------------------------------------------------------------------------------------------------------|----|
| <b>NMR Spectra</b> .....                                                                                                                                                                         | 3  |
| (4-(Aminomethyl)benzyl)triphenylphosphonium bromide ( <b>2a</b> ).....                                                                                                                           | 3  |
| (4-(Aminomethyl)benzyl)tri(4-methylphenyl)phosphonium bromide ( <b>2b</b> ) .....                                                                                                                | 4  |
| (4-(Aminomethyl)benzyl)tri(3,5-dimethylphenyl)phosphonium bromide ( <b>2c</b> ).....                                                                                                             | 6  |
| (4-((4-(4,7-Bis(2-( <i>tert</i> -butoxy)-2-oxoethyl)-1,4,7-triazonan-1-yl)-5-( <i>tert</i> -butoxy)-5-oxopentanamido)methyl)benzyl)triphenylphosphonium bromide ( <b>3a</b> ).....               | 7  |
| (4-((4-(4,7-Bis(2-( <i>tert</i> -butoxy)-2-oxoethyl)-1,4,7-triazonan-1-yl)-5-( <i>tert</i> -butoxy)-5-oxopentanamido)methyl)benzyl)tri(4-methylphenyl)phosphonium bromide ( <b>3b</b> ) .....    | 9  |
| (4-((4-(4,7-Bis(2-( <i>tert</i> -butoxy)-2-oxoethyl)-1,4,7-triazonan-1-yl)-5-( <i>tert</i> -butoxy)-5-oxopentanamido)methyl)benzyl)tri(3,5-dimethylphenyl)phosphonium bromide ( <b>3c</b> )..... | 10 |
| NODAGA-xy-TPP Trifluoroacetate ( <b>4a</b> ) .....                                                                                                                                               | 12 |
| NODAGA-xy-TTP Trifluoroacetate ( <b>4b</b> ).....                                                                                                                                                | 13 |
| NODAGA-xy-TXP Trifluoroacetate ( <b>4c</b> ).....                                                                                                                                                | 15 |
| [ <sup>nat</sup> Ga]Ga-NODAGA-xy-TPP Trifluoroacetate ([ <sup>nat</sup> Ga]Ga <b>4a</b> ) .....                                                                                                  | 16 |
| [ <sup>nat</sup> Ga]Ga-NODAGA-xy-TTP Trifluoroacetate ([ <sup>nat</sup> Ga]Ga <b>4b</b> ).....                                                                                                   | 18 |
| [ <sup>nat</sup> Ga]Ga-NODAGA-xy-TXP Trifluoroacetate ([ <sup>nat</sup> Ga]Ga <b>4c</b> ).....                                                                                                   | 19 |
| <b>iTLC Analysis</b> .....                                                                                                                                                                       | 21 |
| <b>RadioHPLC Analysis</b> .....                                                                                                                                                                  | 22 |
| [ <sup>68</sup> Ga]Ga-NODAGA-xy-TPP ([ <sup>68</sup> Ga]Ga <b>4a</b> ).....                                                                                                                      | 22 |
| [ <sup>68</sup> Ga]Ga-NODAGA-xy-TTP ([ <sup>68</sup> Ga]Ga <b>4b</b> ) .....                                                                                                                     | 22 |
| [ <sup>68</sup> Ga]Ga-NODAGA-xy-TXP ([ <sup>68</sup> Ga]Ga <b>4c</b> ) .....                                                                                                                     | 23 |
| <b>Langendorff Isolated Heart Perfusion</b> .....                                                                                                                                                | 24 |
| Stability Study.....                                                                                                                                                                             | 24 |
| Effects of 600 nM CCCP Infusion on Haemodynamic Parameters.....                                                                                                                                  | 25 |
| Triple $\gamma$ -Detector System Raw Data for [ <sup>99m</sup> Tc]Tc-sestaMIBI Using the Two-Injection Protocol ...                                                                              | 26 |
| Triple $\gamma$ -Detector System Raw Data for [ <sup>68</sup> Ga]Ga-NODAGA-xy-TXP ([ <sup>68</sup> Ga]Ga <b>4c</b> ) .....                                                                       | 27 |
| <b>DFT Calculations</b> .....                                                                                                                                                                    | 29 |

## NMR Spectra

(4-(Aminomethyl)benzyl)triphenylphosphonium bromide (**2a**)

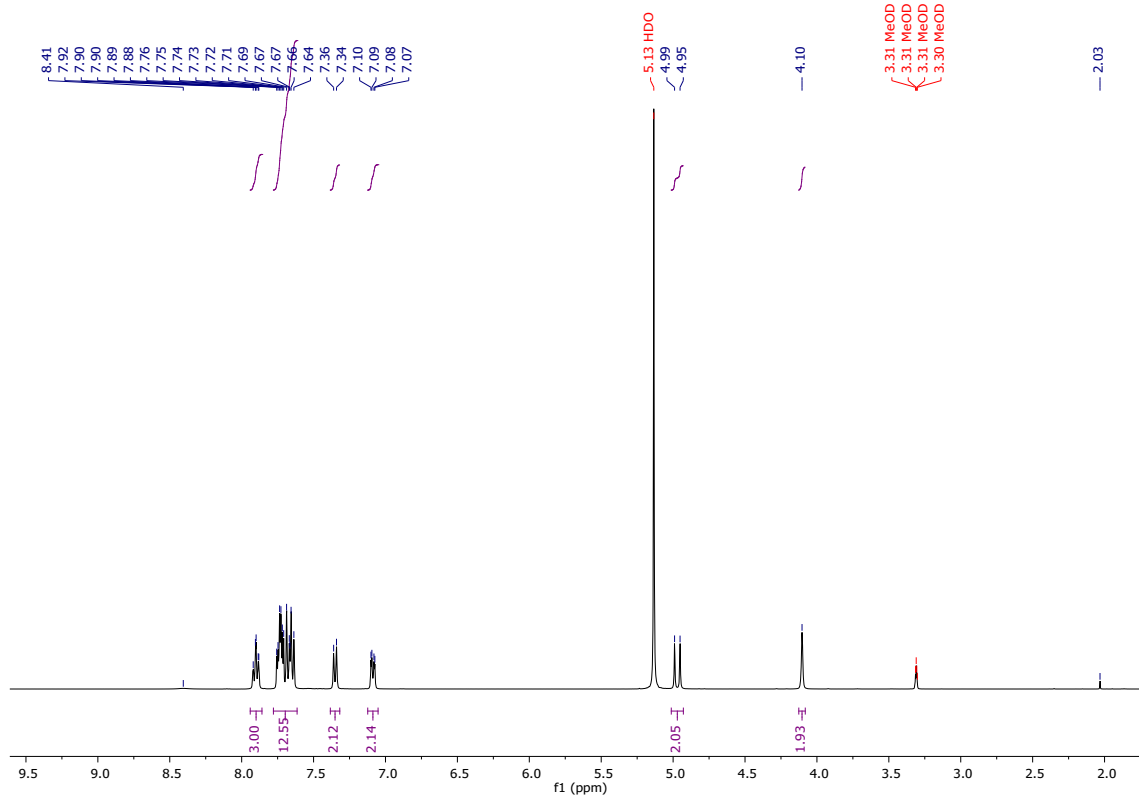

Figure S1: <sup>1</sup>H NMR spectrum (MeOD, 400 MHz, 298 K).

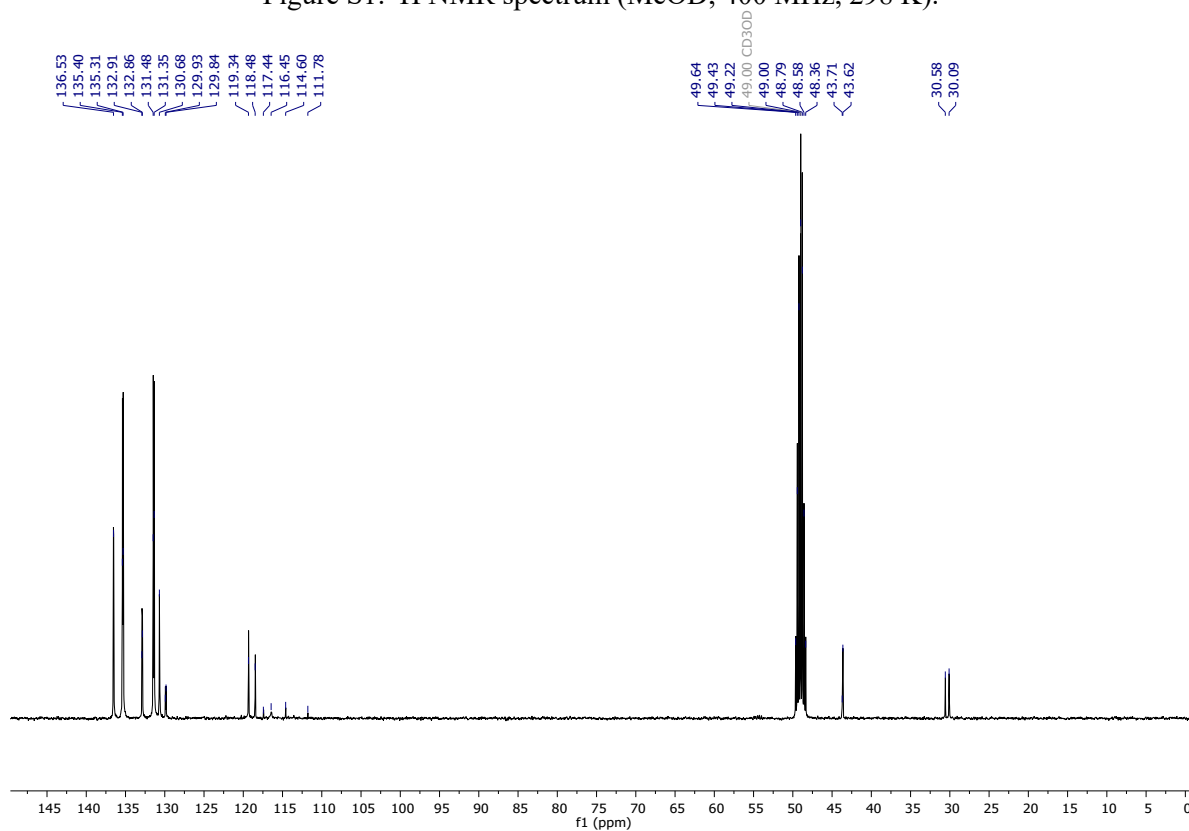

Figure S2: <sup>13</sup>C {<sup>1</sup>H} NMR spectrum (MeOD, 100 MHz, 298 K).

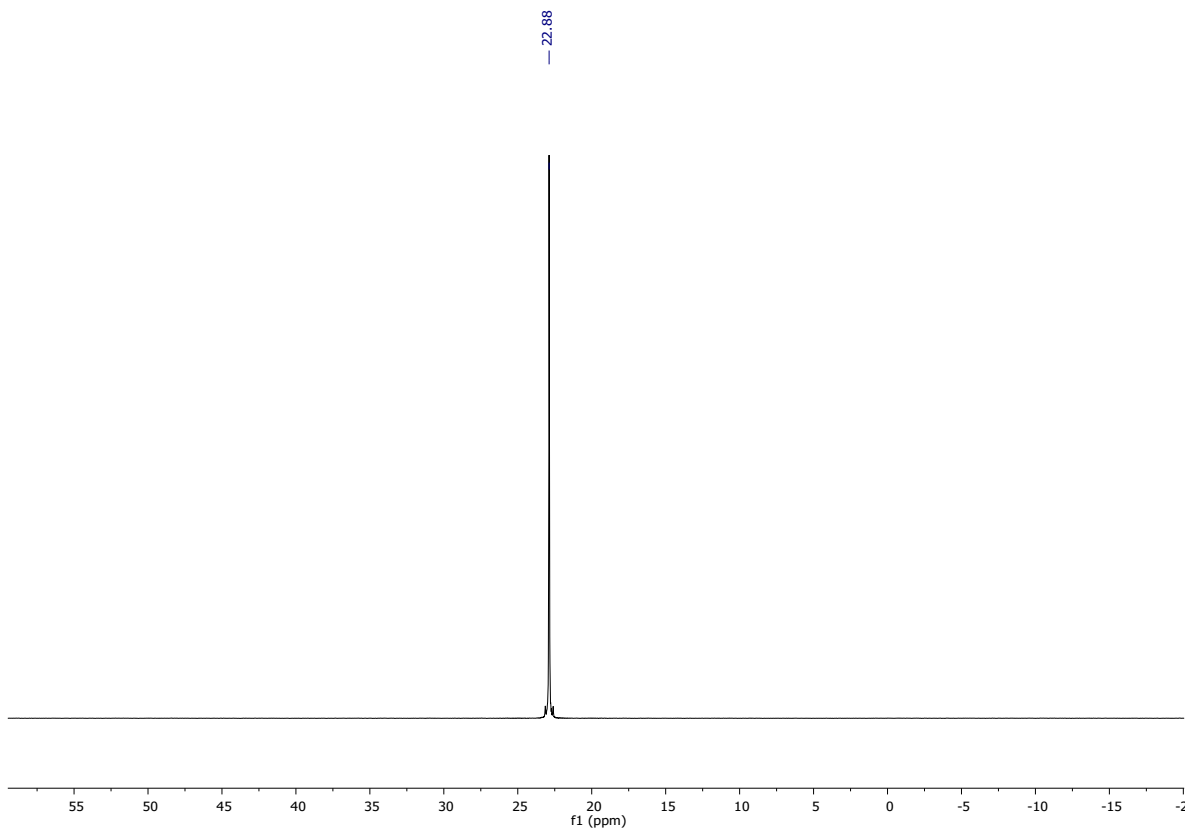

Figure S3:  $^{31}\text{P}\{^1\text{H}\}$  NMR spectrum (MeOD, 162 MHz, 298 K).

(4-(Aminomethyl)benzyl)tri(4-methylphenyl)phosphonium bromide (**2b**)

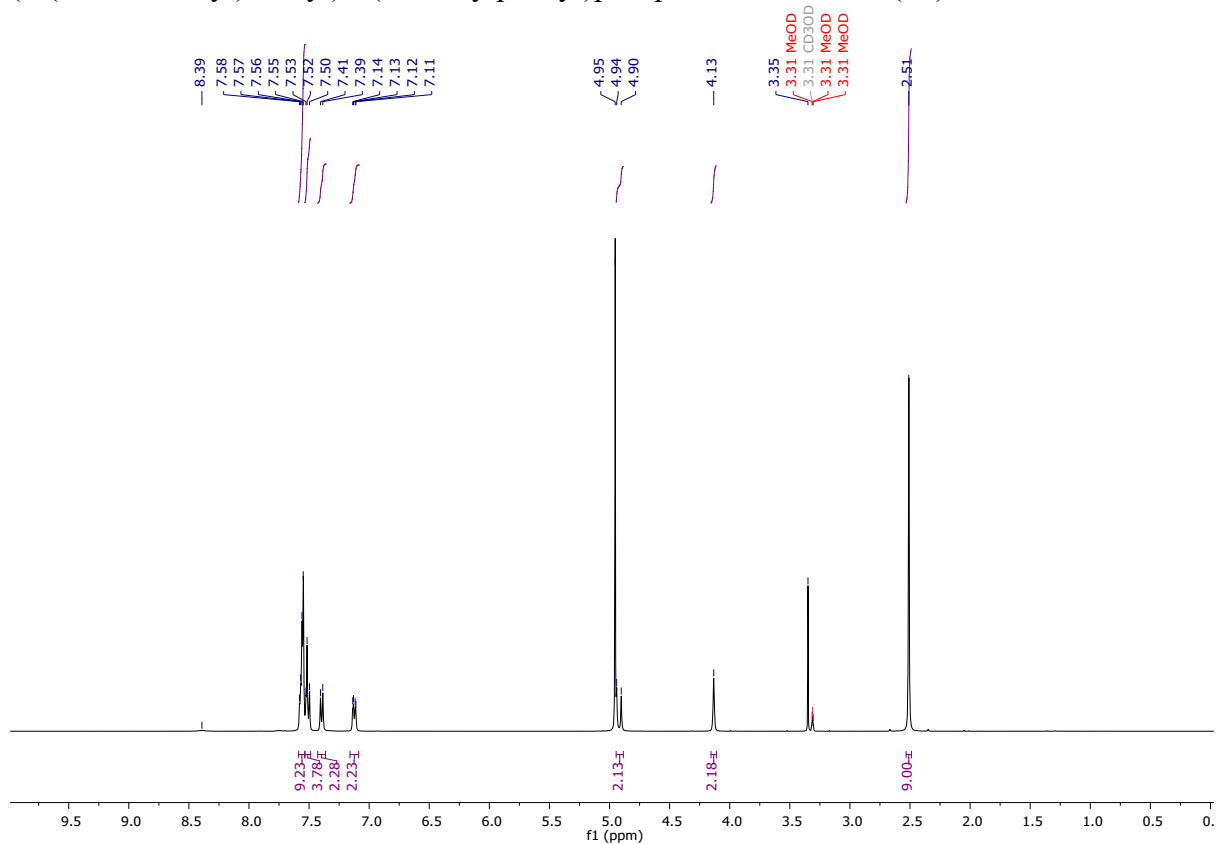

Figure S4:  $^1\text{H}$  NMR spectrum (MeOD, 400 MHz, 298 K).

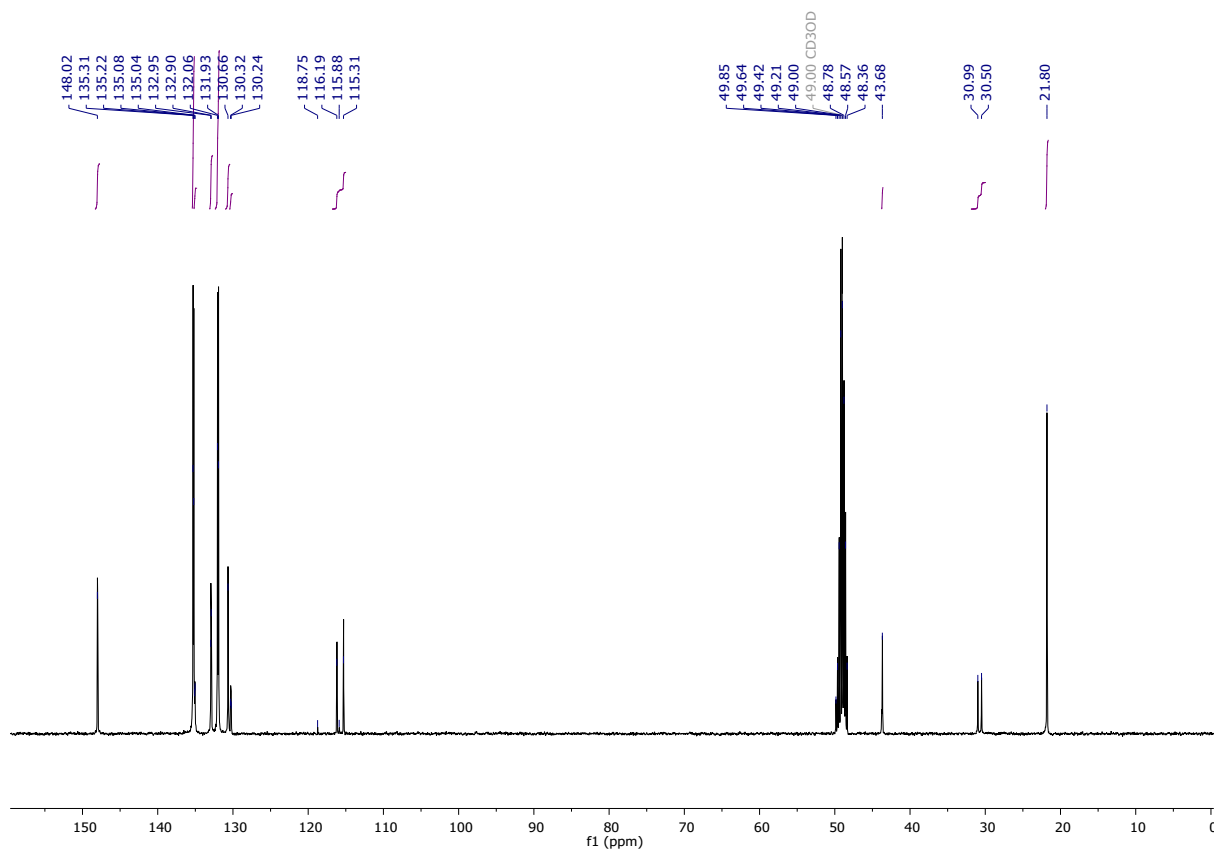

Figure S5:  $^{13}\text{C}\{^1\text{H}\}$  NMR spectrum (MeOD, 100 MHz, 298 K).

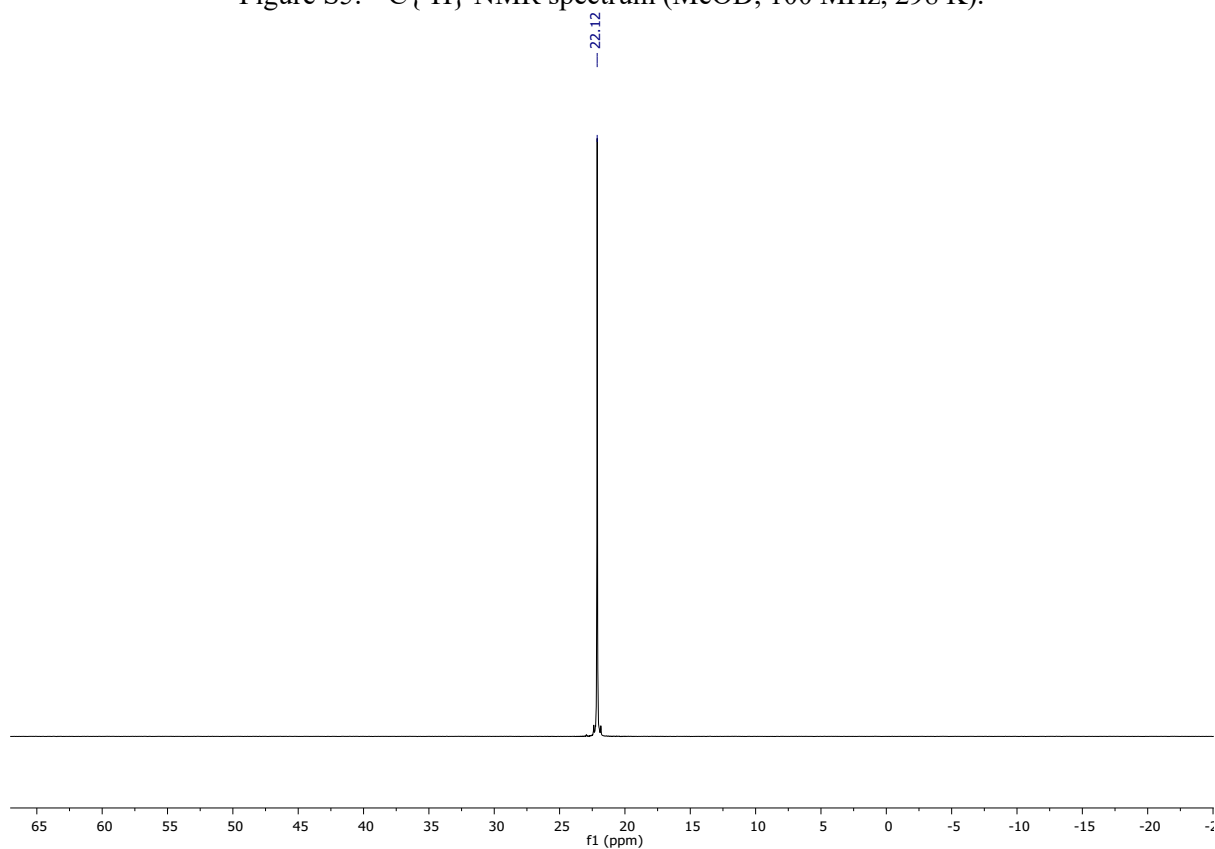

Figure S6:  $^{31}\text{P}\{^1\text{H}\}$  NMR spectrum (MeOD, 162 MHz, 298 K).

(4-(Aminomethyl)benzyl)tri(3,5-dimethylphenyl)phosphonium bromide (**2c**)

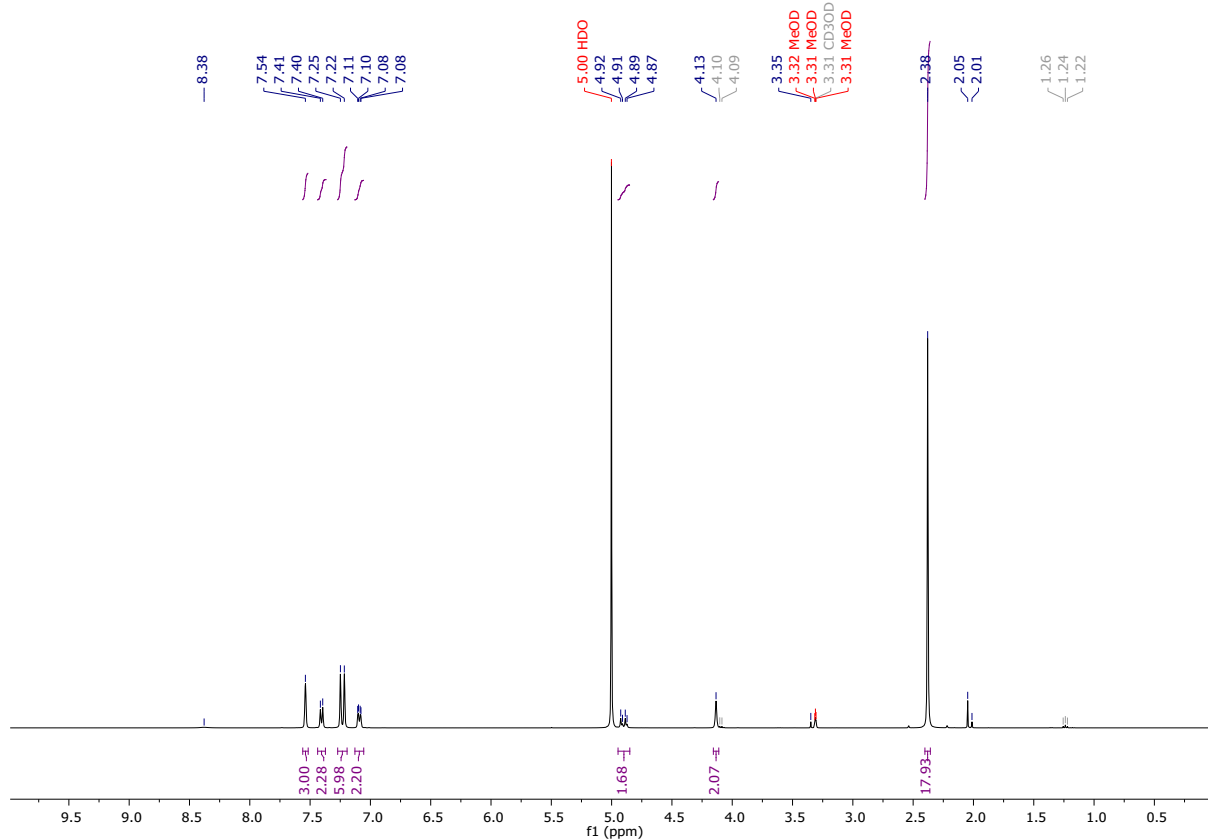

Figure S7: <sup>1</sup>H NMR spectrum MeOD, 400 MHz, 298 K).

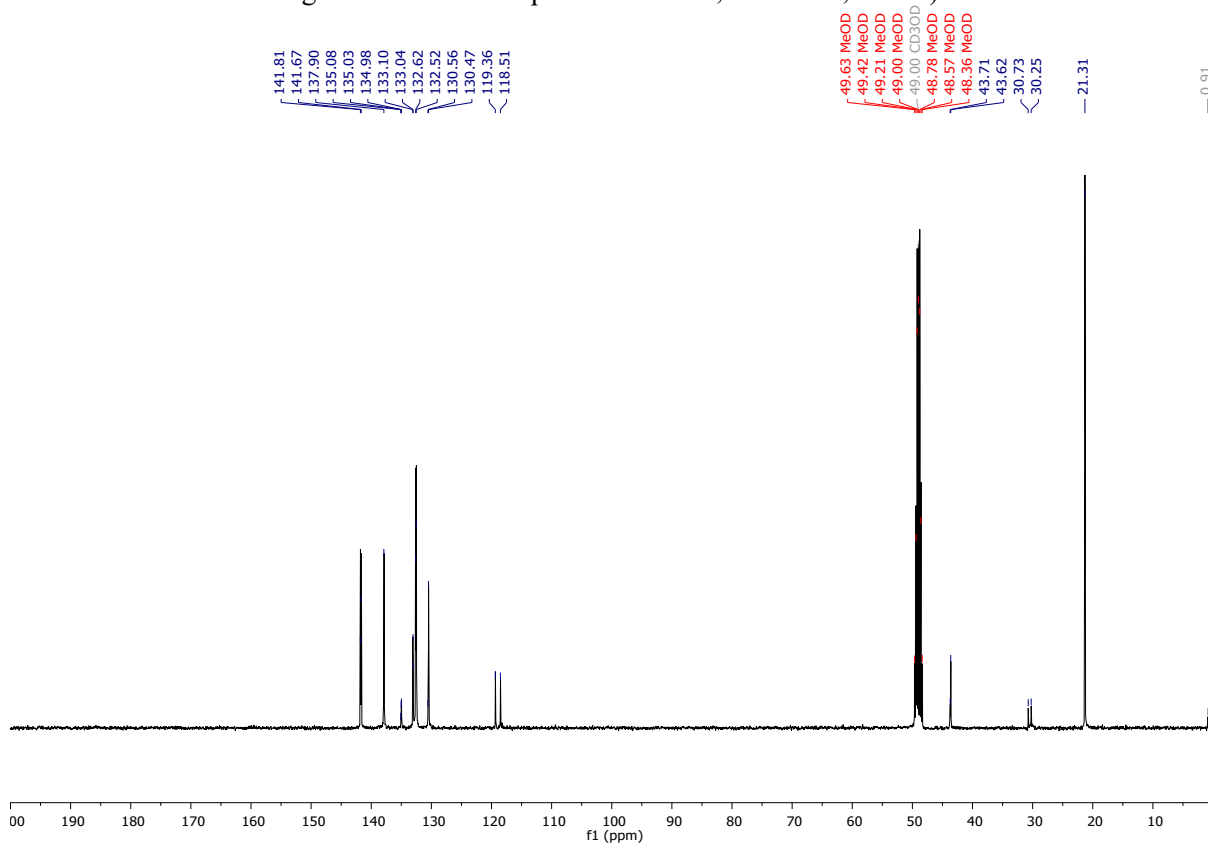

Figure S8: <sup>13</sup>C {<sup>1</sup>H} NMR spectrum (MeOD, 100 MHz, 298 K).

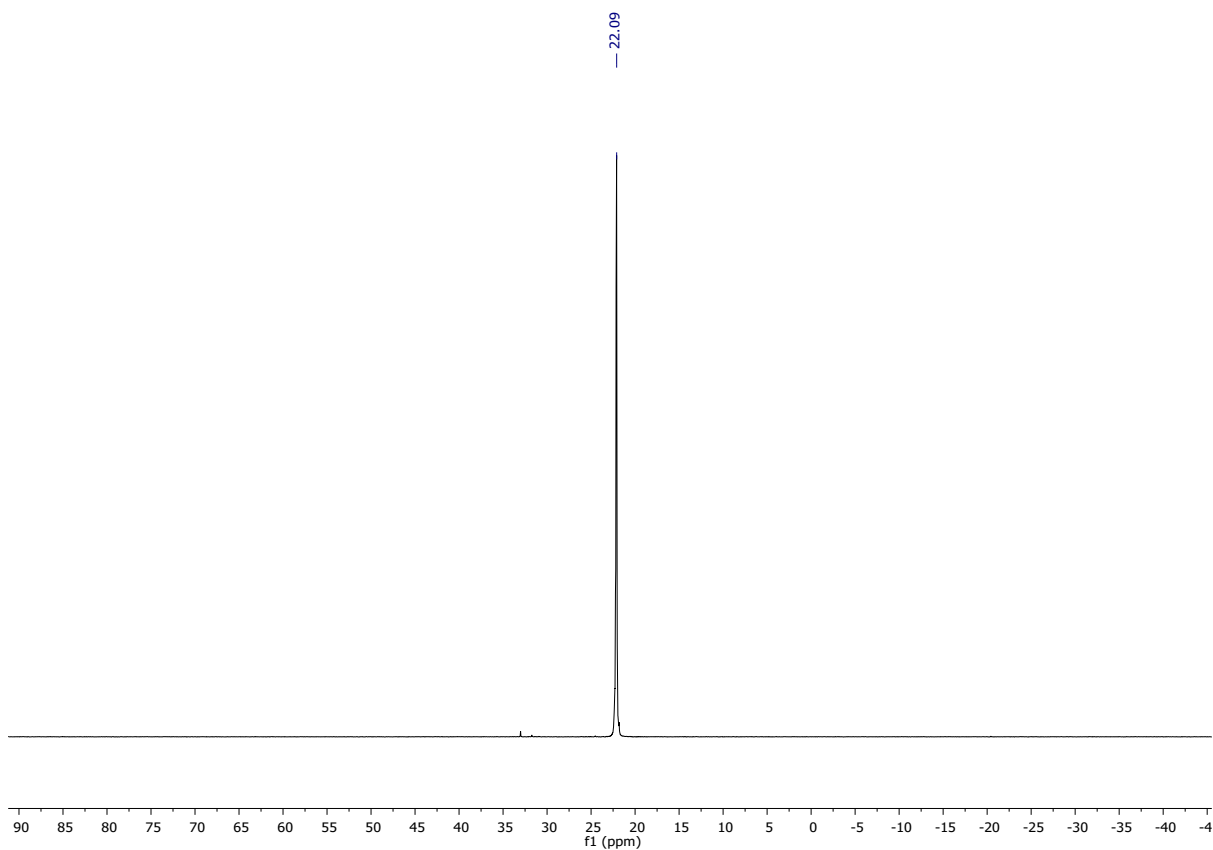

Figure S9:  $^{31}\text{P}\{^1\text{H}\}$  NMR spectrum (MeOD, 162 MHz, 298 K).

(4-((4-(4,7-Bis(2-(*tert*-butoxy)-2-oxoethyl)-1,4,7-triazonan-1-yl)-5-(*tert*-butoxy)-5-oxopentanamido)methyl)benzyl)triphenylphosphonium bromide (**3a**)

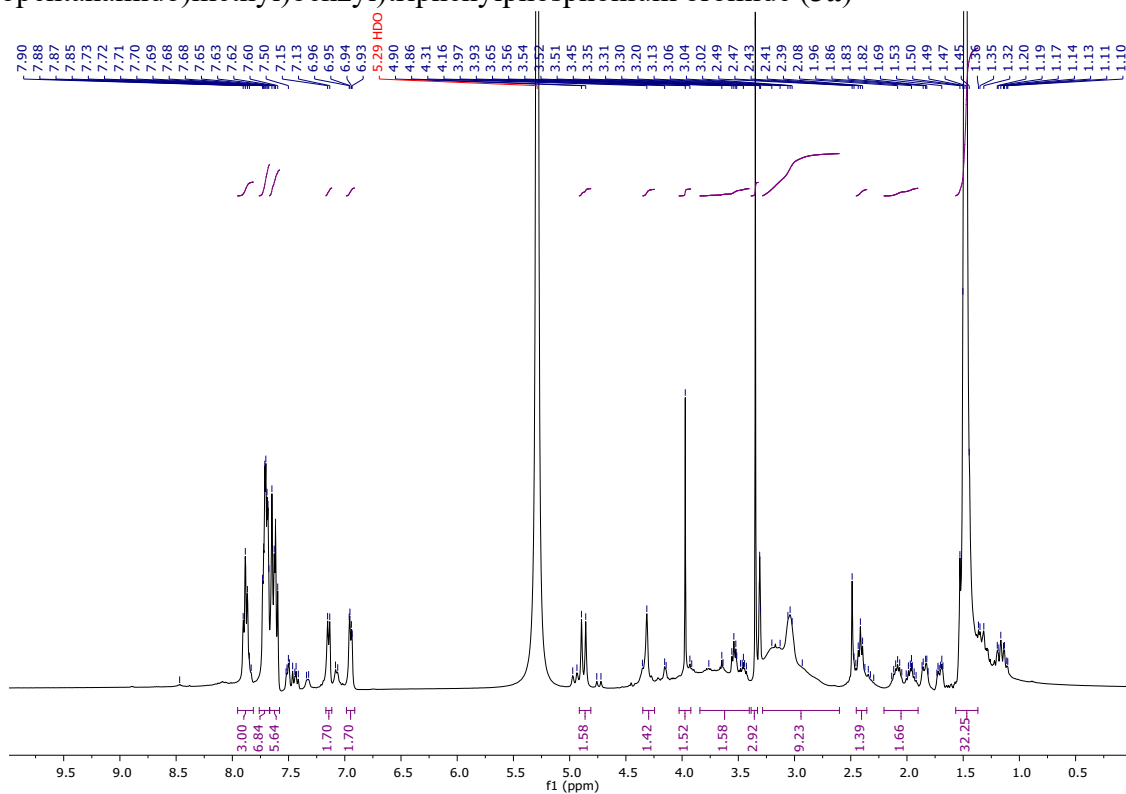

Figure S10:  $^1\text{H}$  NMR spectrum (MeOD, 400 MHz, 298 K).

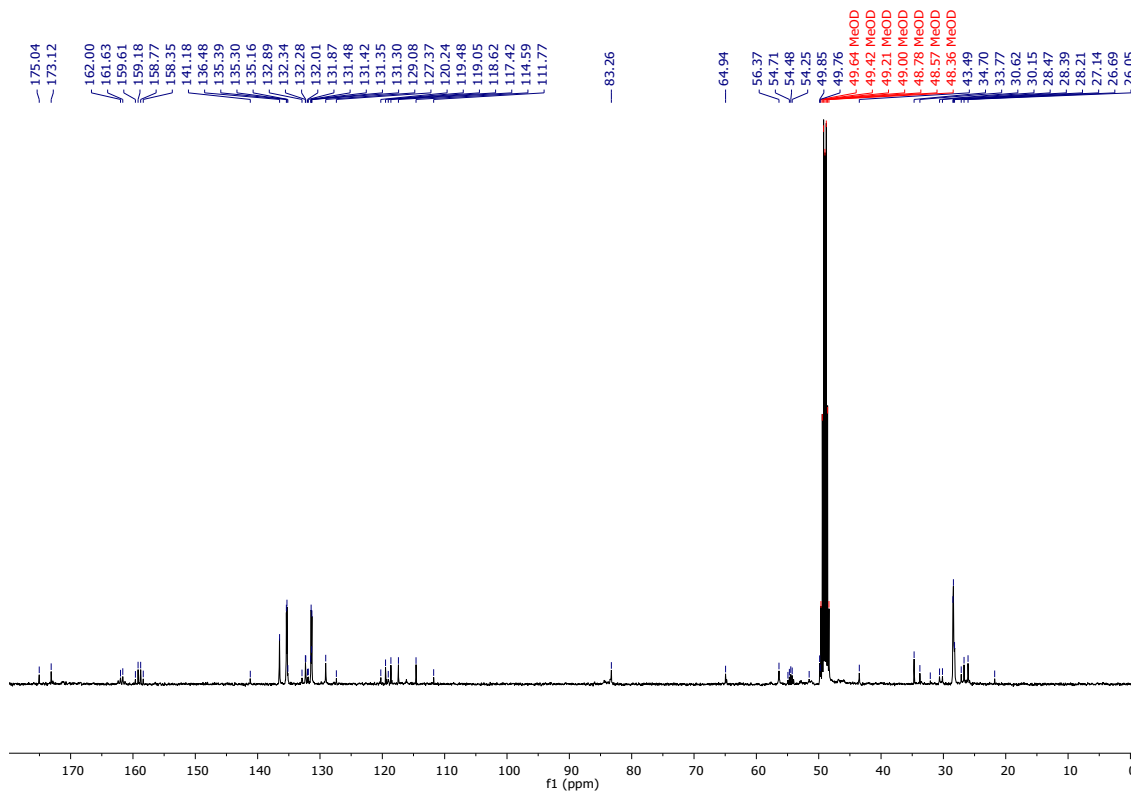

Figure S11:  $^{13}\text{C}\{^1\text{H}\}$  NMR spectrum (MeOD, 100 MHz, 298 K).

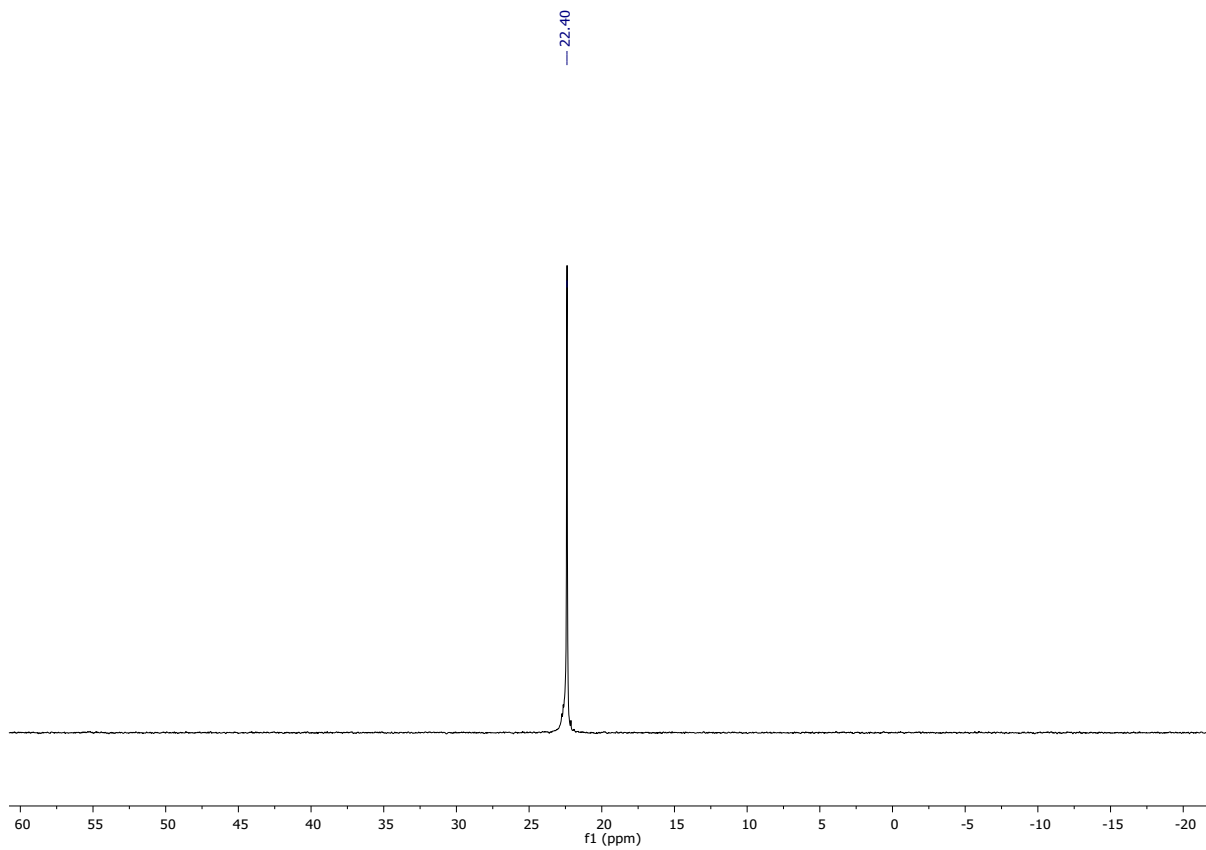

Figure S12:  $^{31}\text{P}\{^1\text{H}\}$  NMR spectrum (MeOD, 162 MHz, 298 K).



(4-((4-(4,7-Bis(2-(*tert*-butoxy)-2-oxoethyl)-1,4,7-triazonan-1-yl)-5-(*tert*-butoxy)-5-oxopentanamido)methyl)benzyl)tri(4-methylphenyl)phosphonium bromide (**3b**)

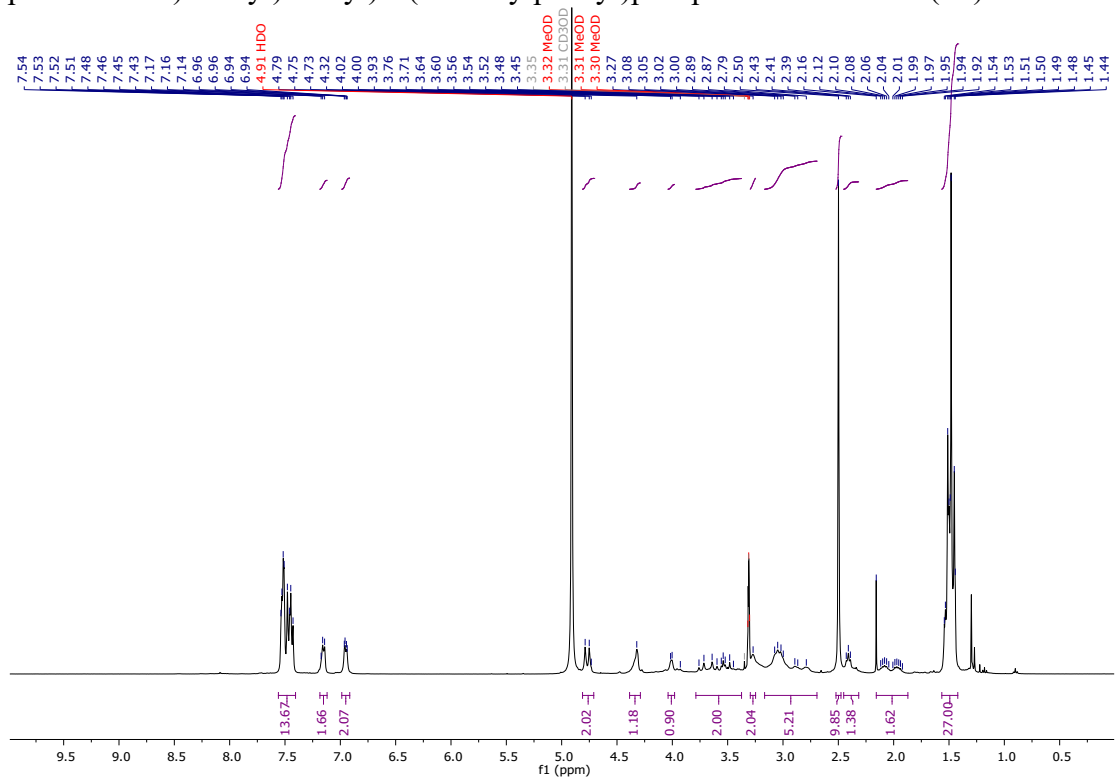

Figure S13:  $^1\text{H}$  NMR spectrum (MeOD, 400 MHz, 298 K).

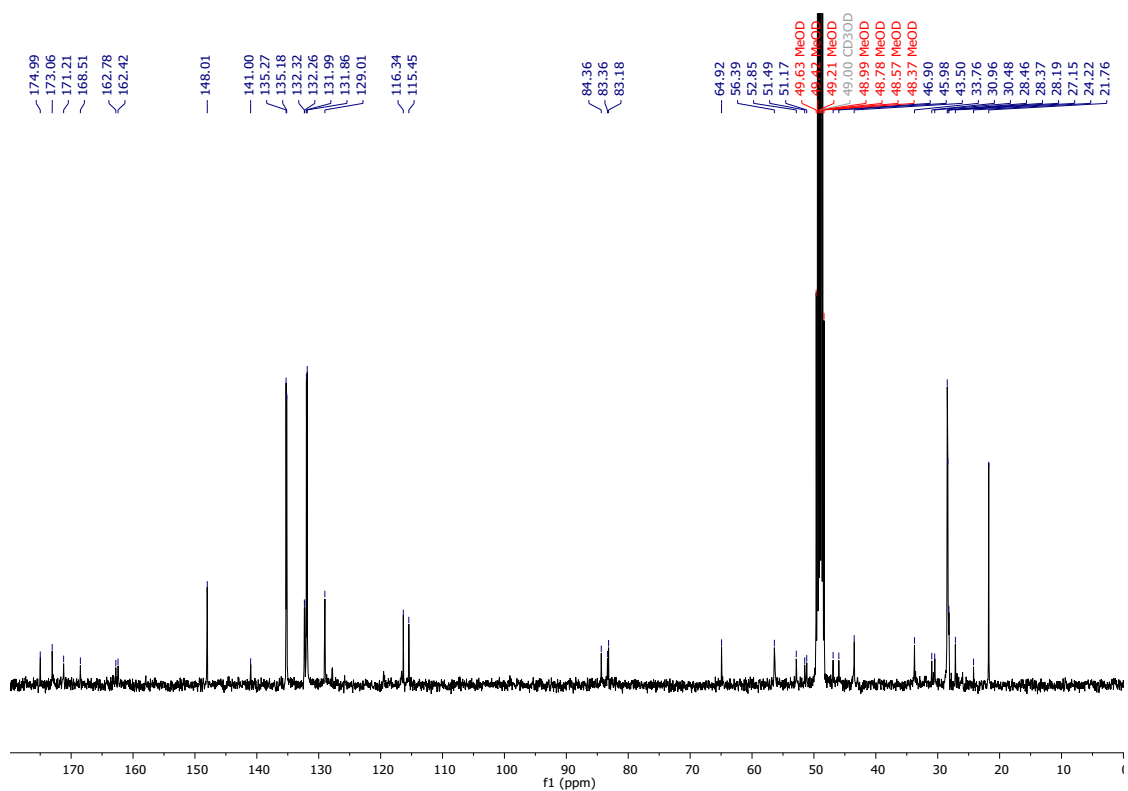

Figure S14:  $^{13}\text{C}\{^1\text{H}\}$  NMR spectrum (MeOD, 100 MHz, 298 K).

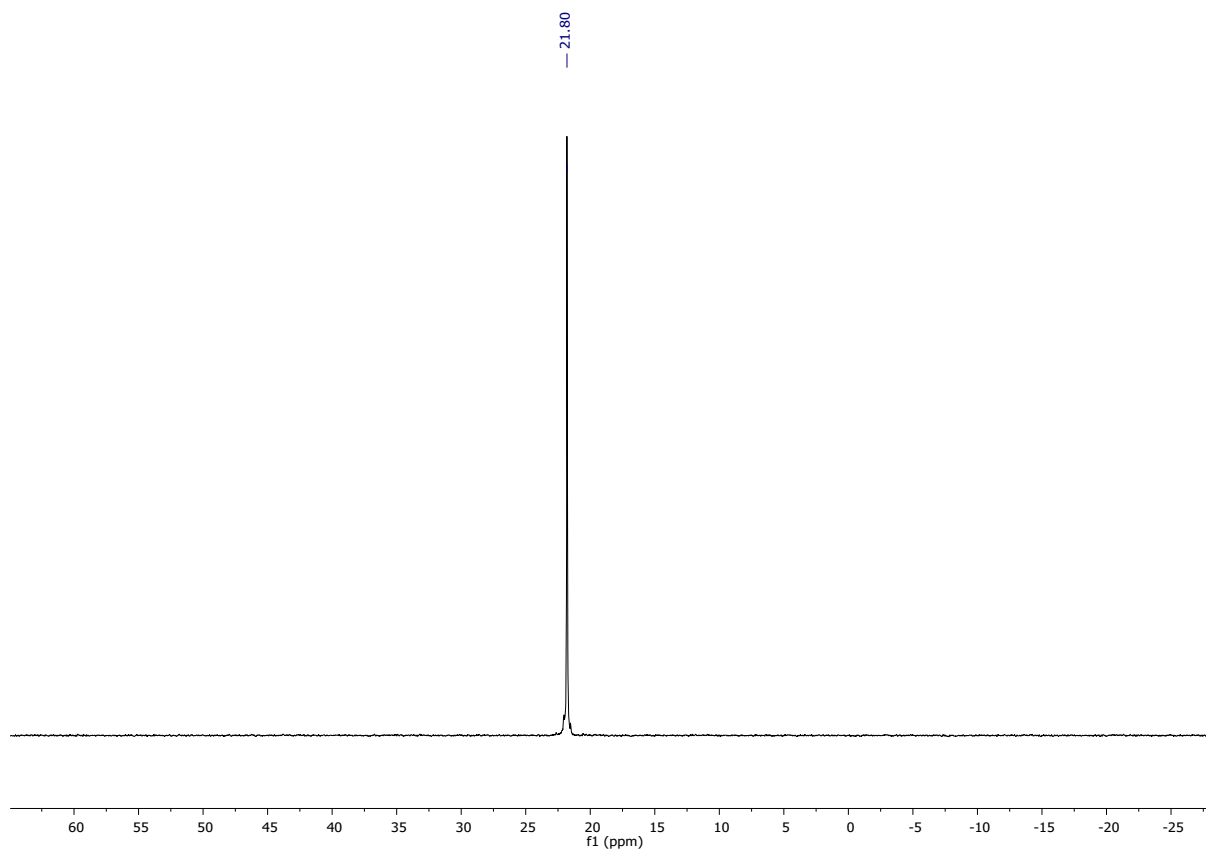

Figure S15:  $^{31}\text{P}\{^1\text{H}\}$  NMR spectrum (MeOD, 162 MHz, 298 K).

(4-((4-(4,7-Bis(2-(*tert*-butoxy)-2-oxoethyl)-1,4,7-triazonan-1-yl)-5-(*tert*-butoxy)-5-oxopentanamido)methyl)benzyl)tri(3,5-dimethylphenyl)phosphonium bromide (**3c**)

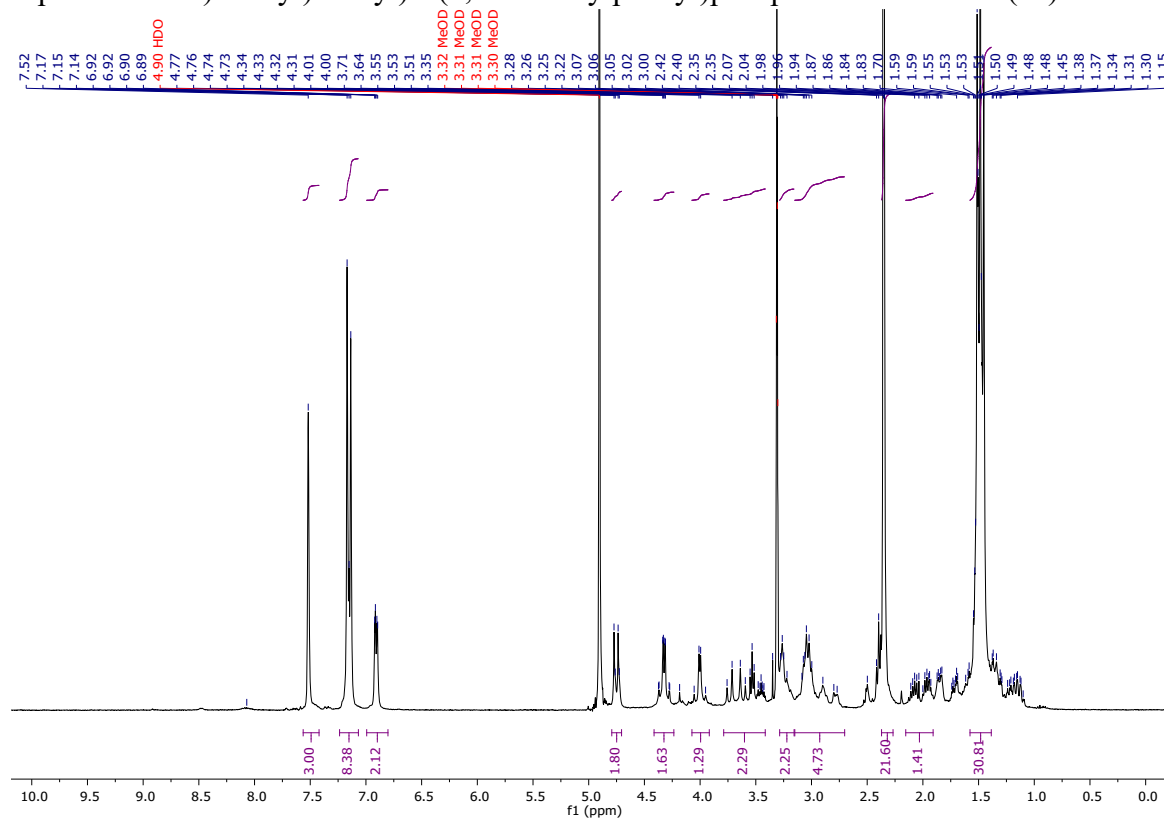

Figure S16:  $^1\text{H}$  NMR spectrum (MeOD, 400 MHz, 298 K).

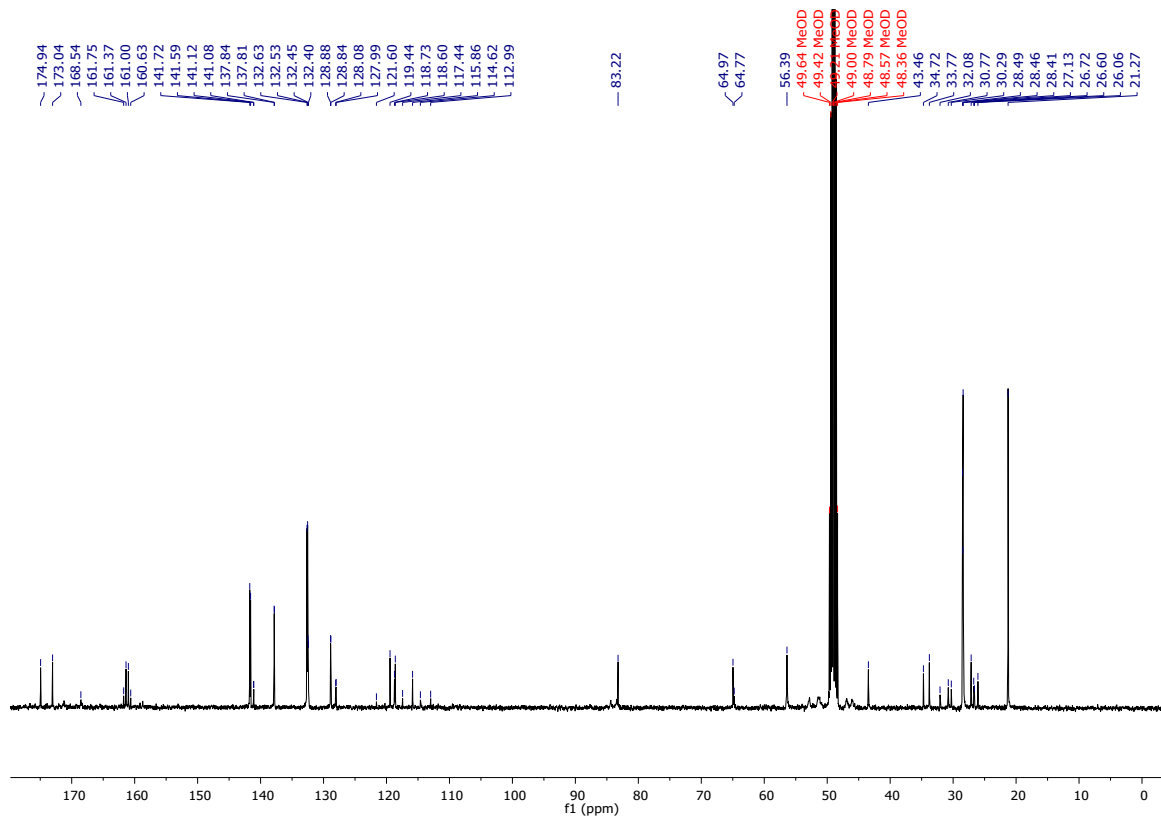

Figure S17:  $^{13}\text{C}\{^1\text{H}\}$  NMR spectrum (MeOD, 100 MHz, 298 K).

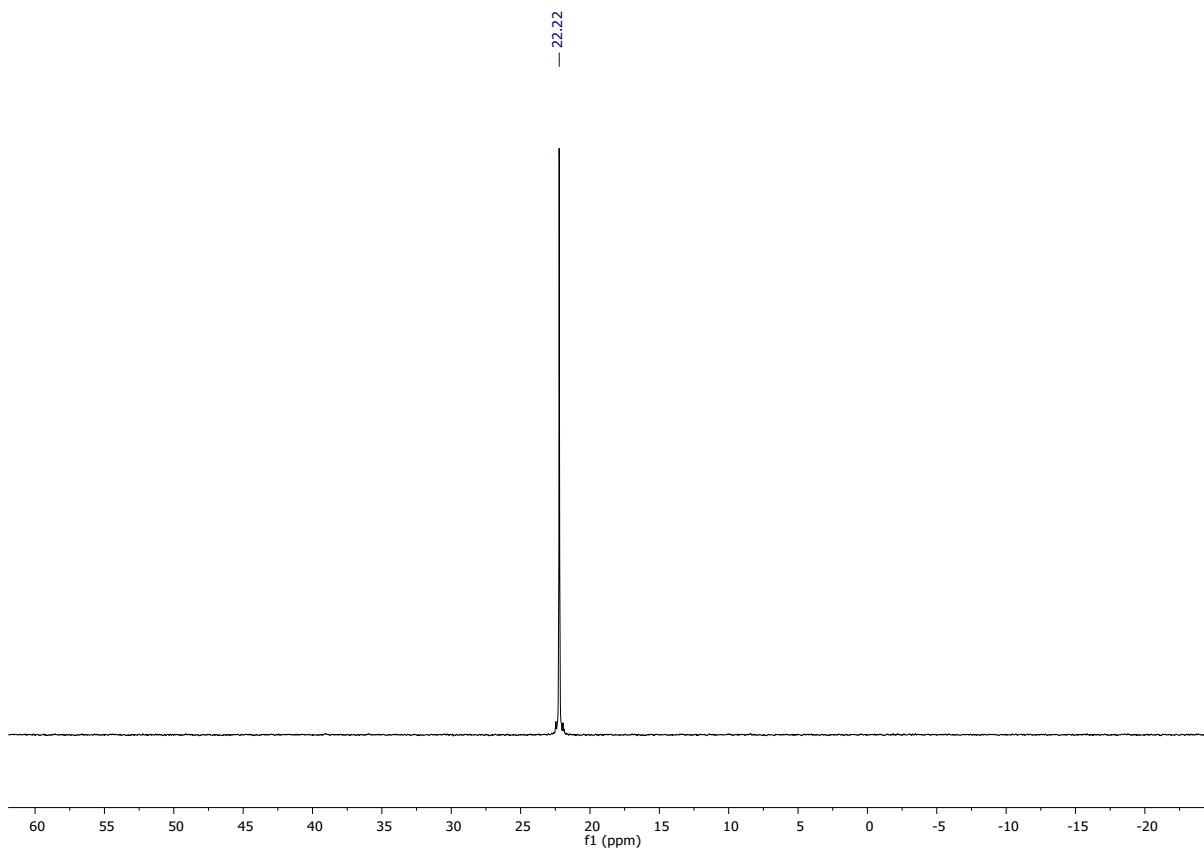

Figure S18:  $^{31}\text{P}\{^1\text{H}\}$  NMR spectrum (MeOD, 162 MHz, 298 K).

NODAGA-xy-TPP Trifluoroacetate (**4a**)

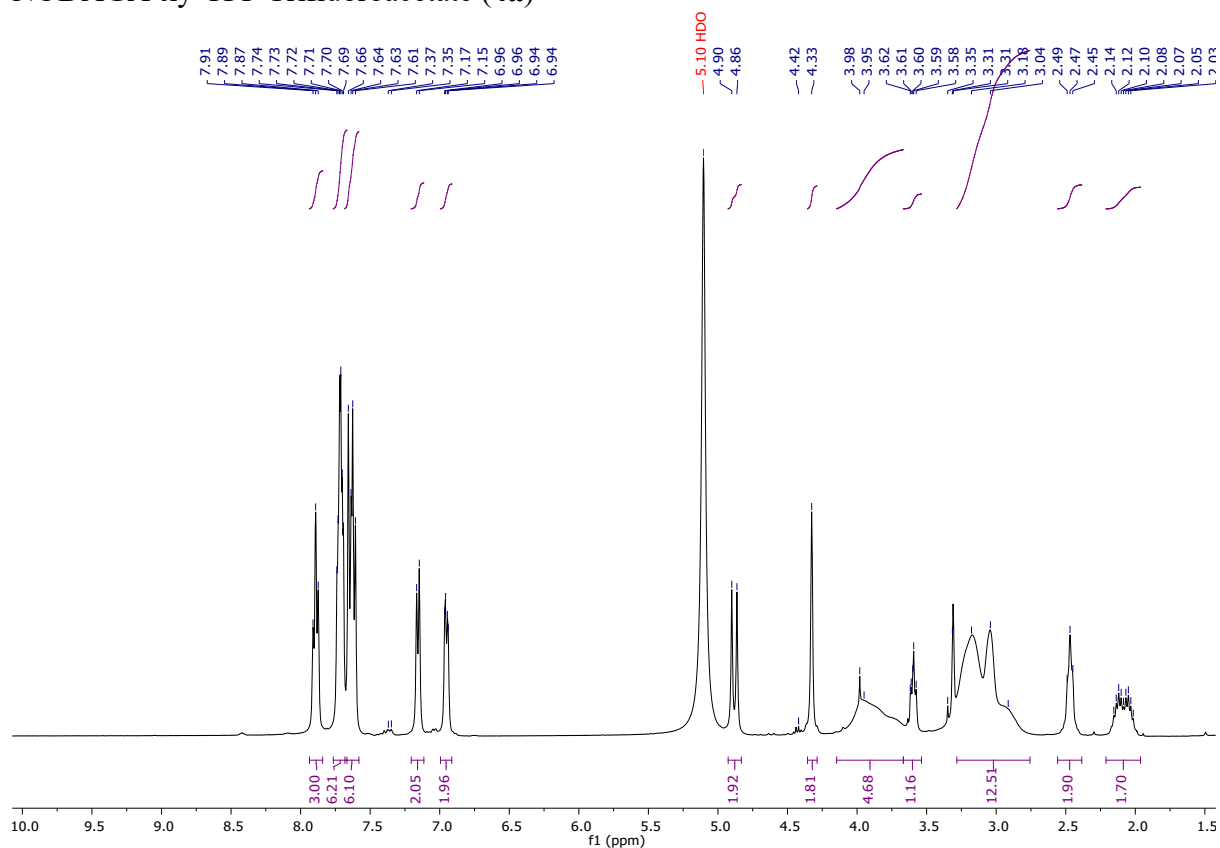

Figure S19: <sup>1</sup>H NMR spectrum (MeOD, 400 MHz, 298 K).

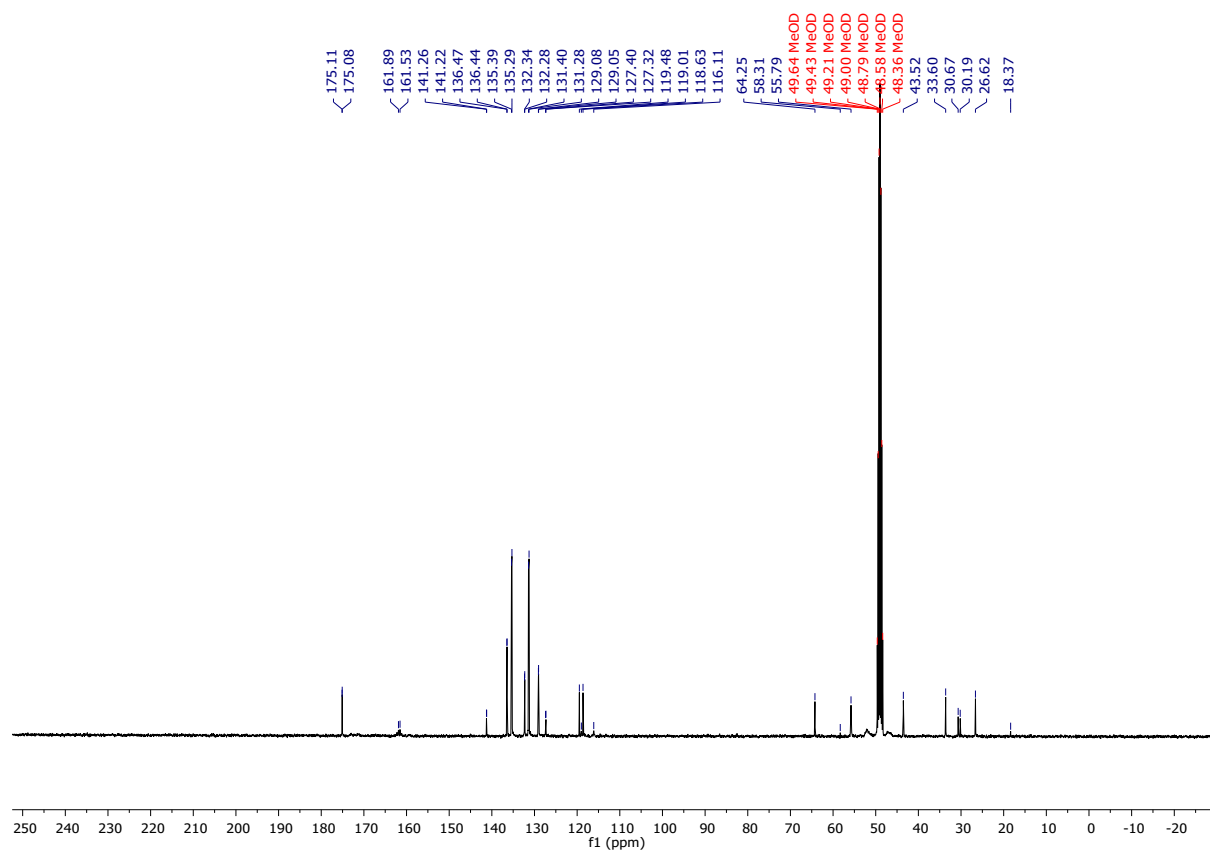

Figure S20: <sup>13</sup>C {<sup>1</sup>H} NMR spectrum (MeOD, 100 MHz, 298 K).

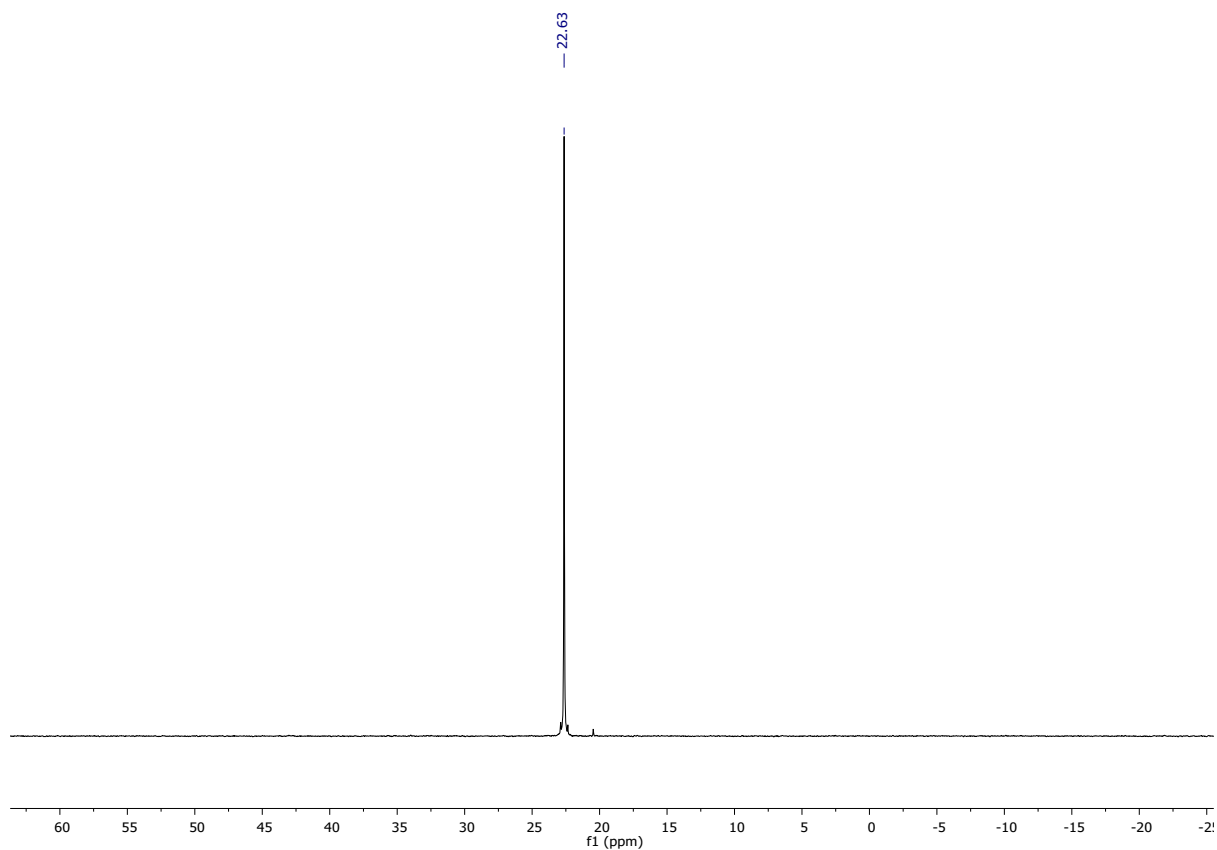

Figure S21:  $^{31}\text{P}\{^1\text{H}\}$  NMR spectrum (MeOD, 162 MHz, 298 K).

NODAGA-xy-TTP Trifluoroacetate (**4b**)

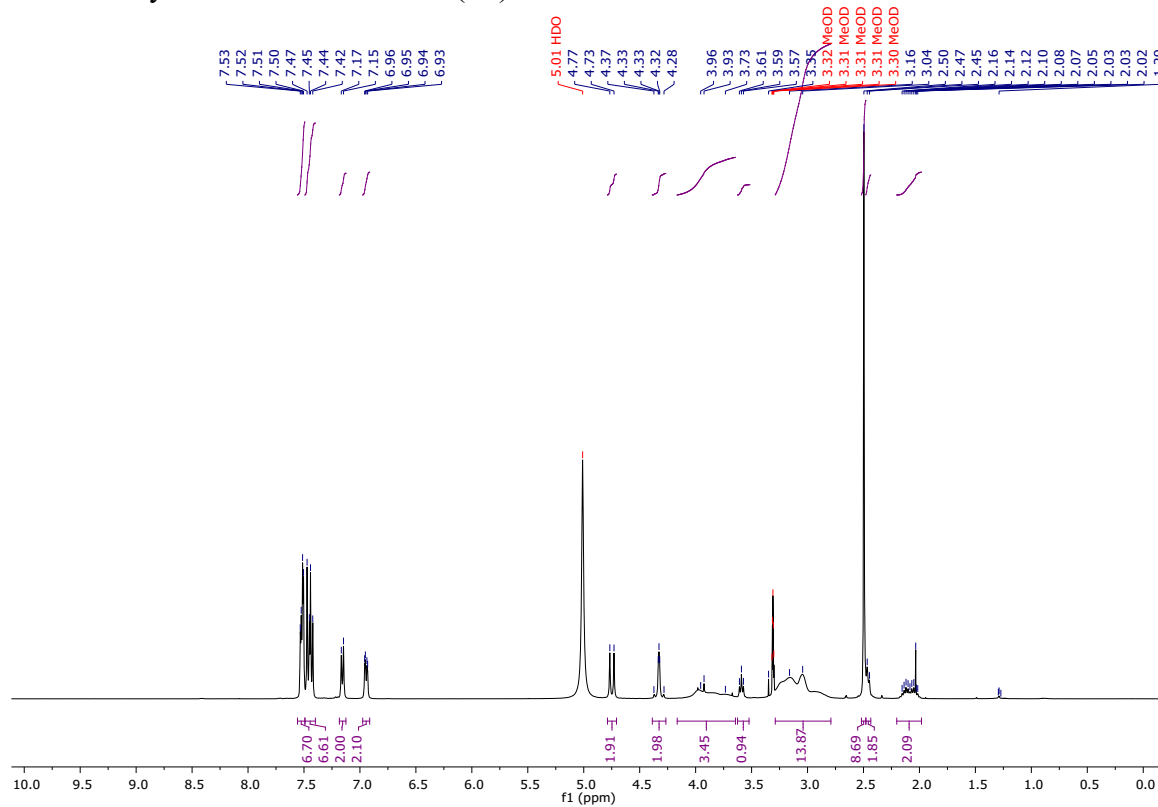

Figure S22:  $^1\text{H}$  NMR spectrum (MeOD, 400 MHz, 298 K).

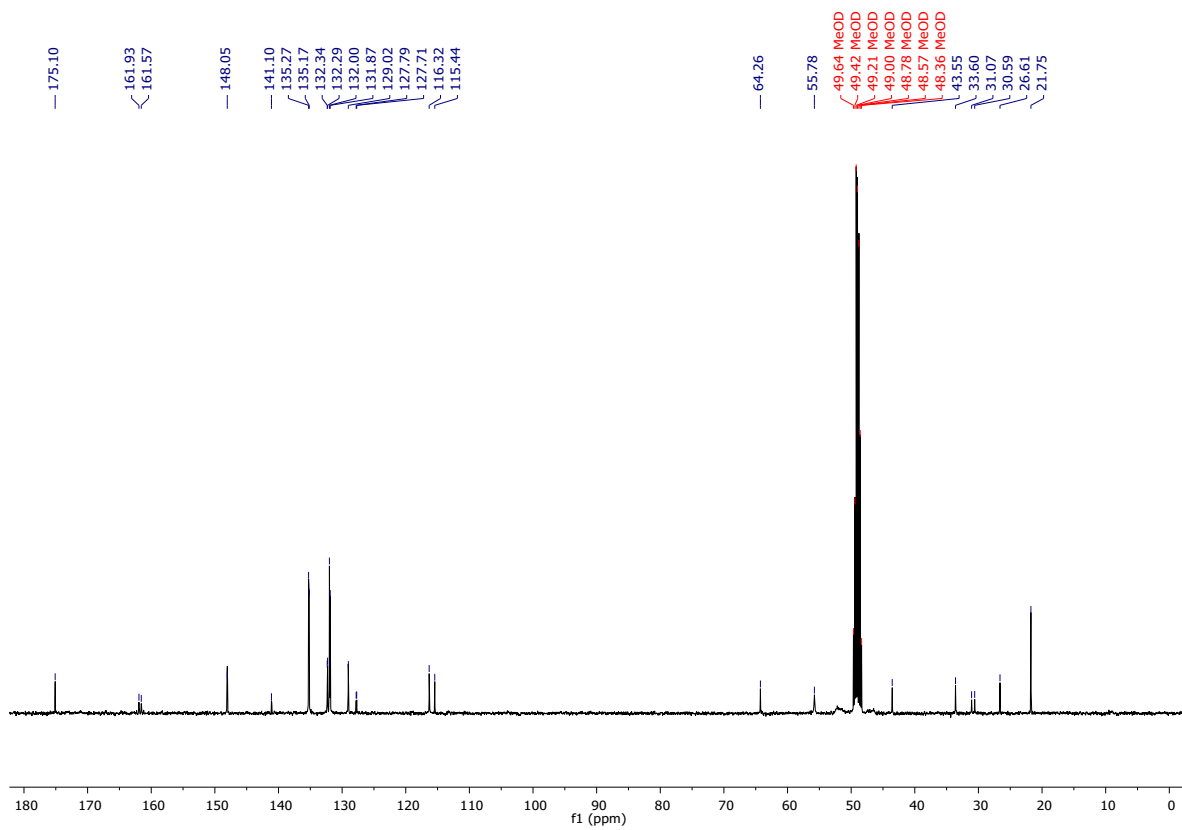

Figure S23:  $^{13}\text{C}\{^1\text{H}\}$  NMR spectrum (MeOD, 100 MHz, 298 K).

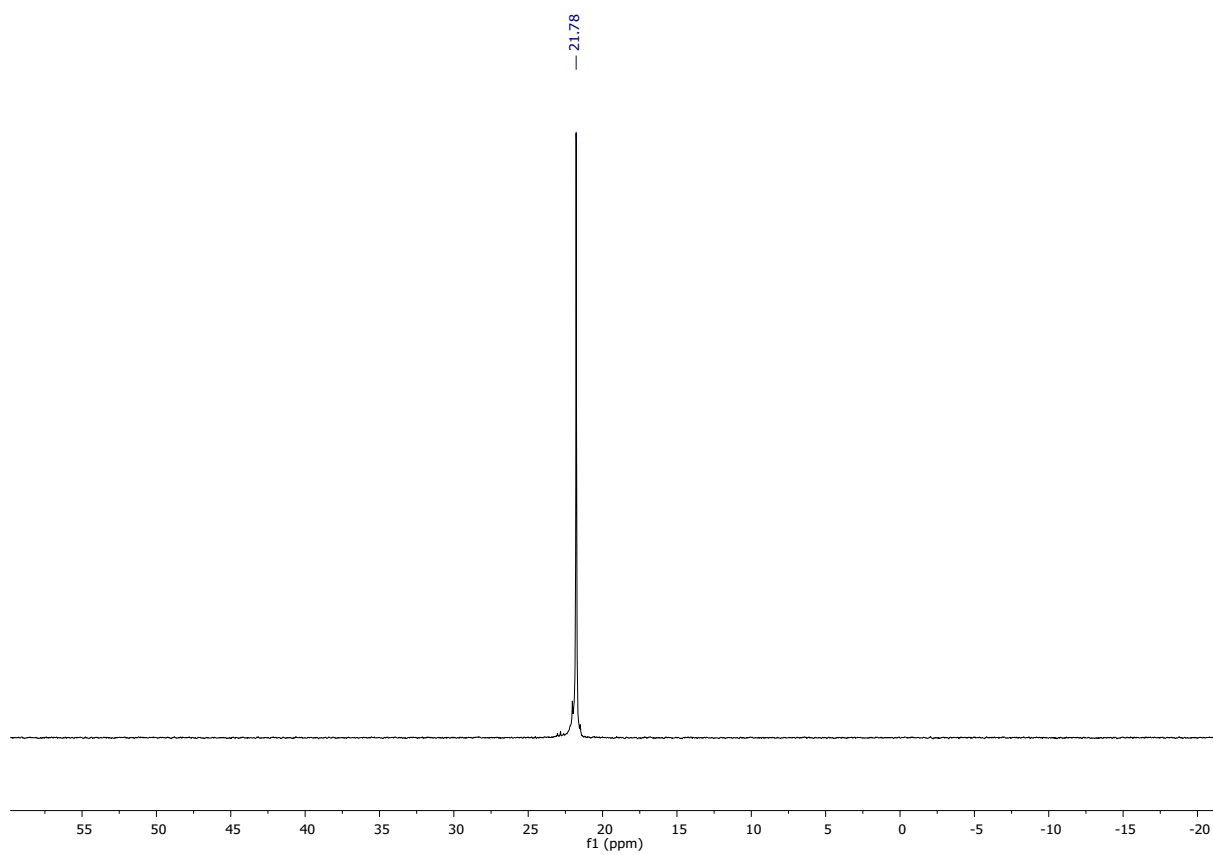

Figure S24:  $^{31}\text{P}\{^1\text{H}\}$  NMR spectrum (MeOD, 162 MHz, 298 K).

NODAGA-xy-TXP Trifluoroacetate (**4c**)

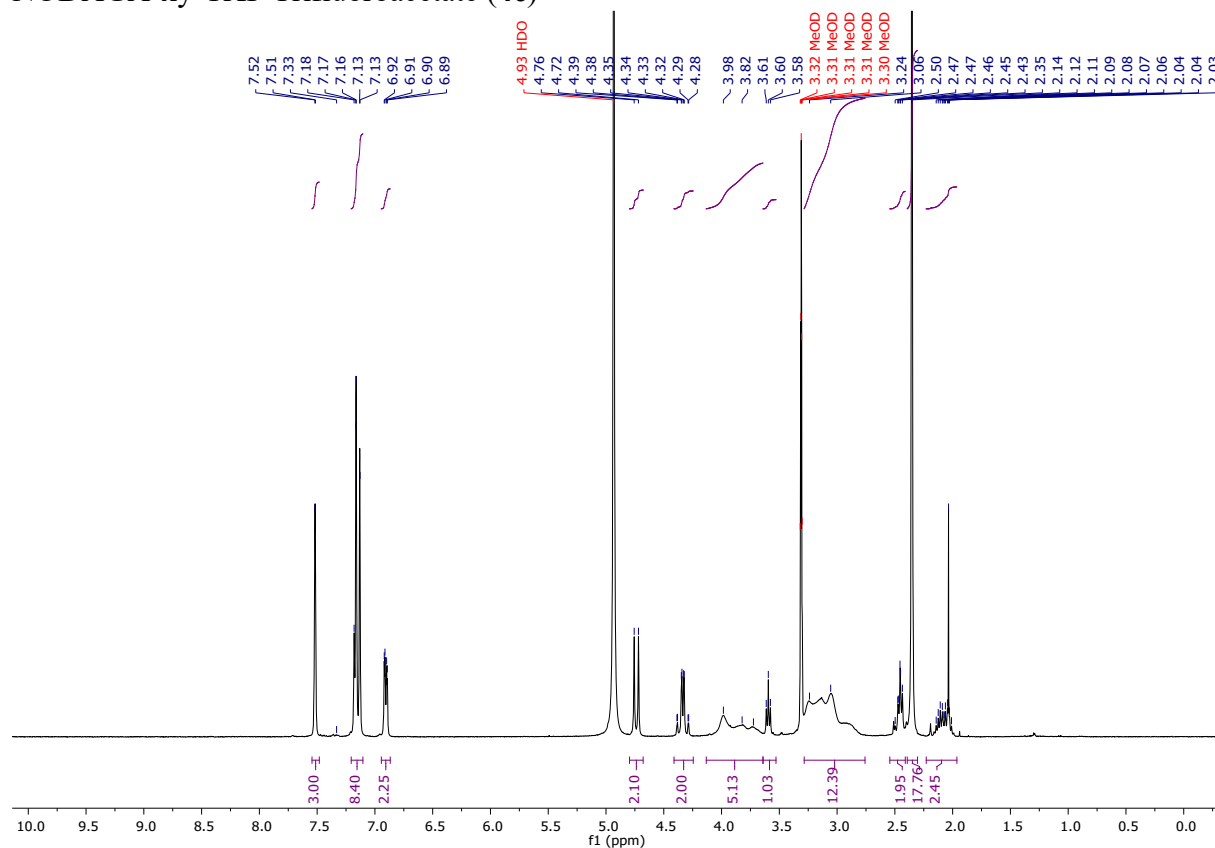

Figure S25: <sup>1</sup>H NMR spectrum (MeOD, 400 MHz, 298 K).

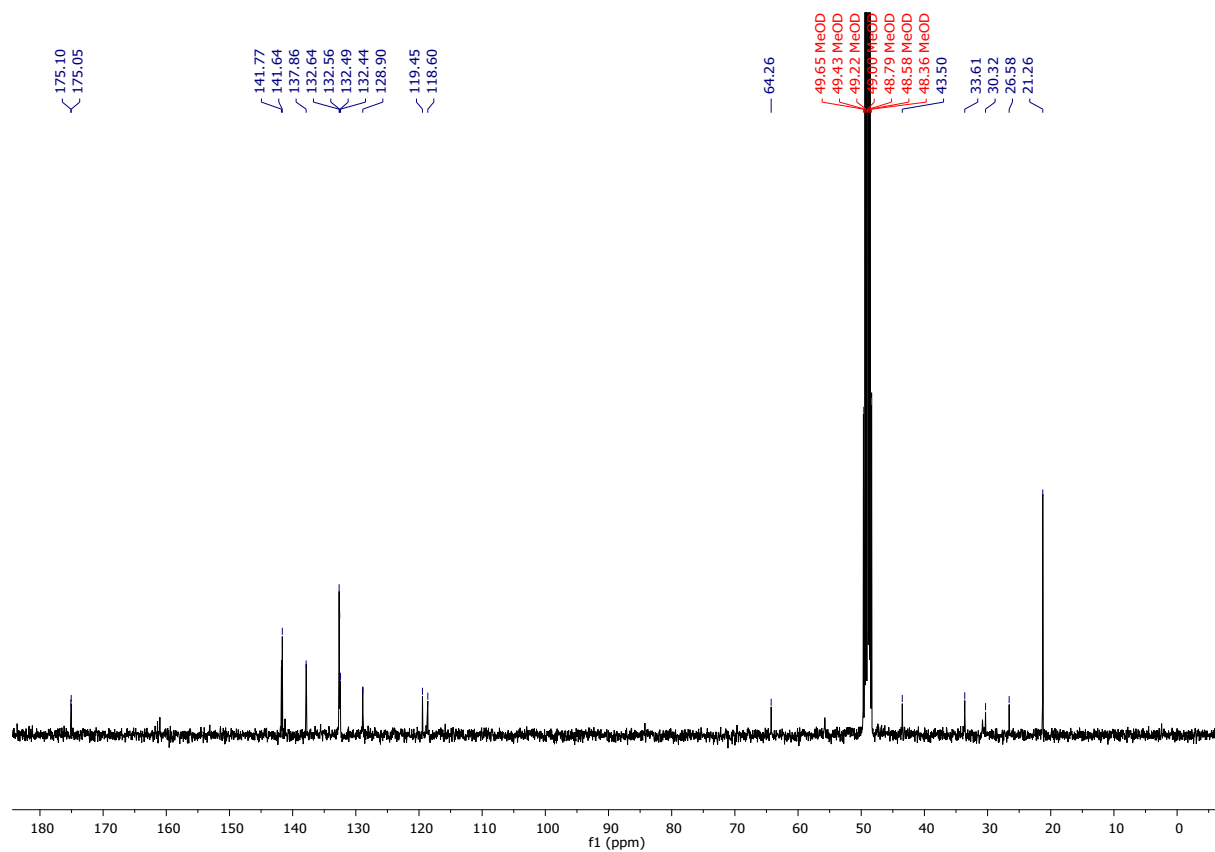

Figure S26: <sup>13</sup>C {<sup>1</sup>H} NMR spectrum (MeOD, 100 MHz, 298 K).

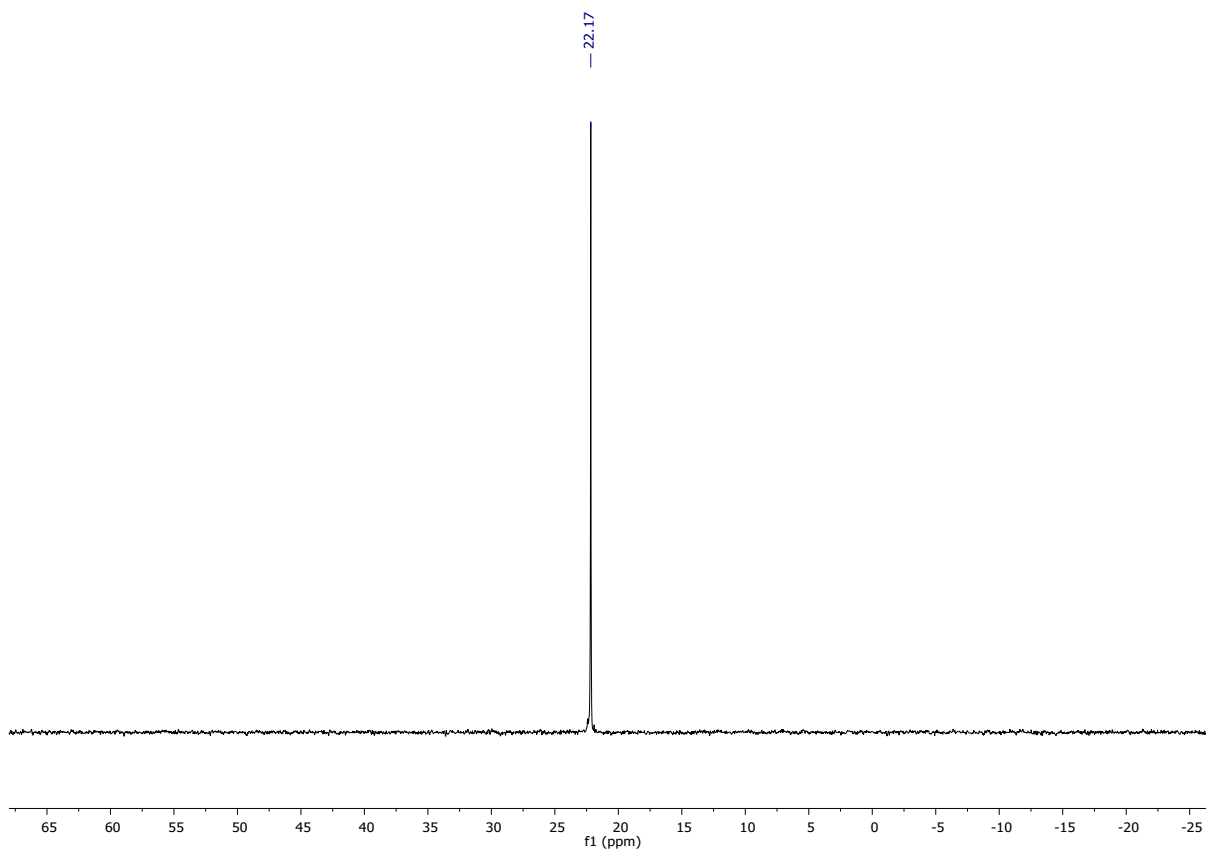

Figure S27:  $^{31}\text{P}\{^1\text{H}\}$  NMR spectrum (MeOD, 162 MHz, 298 K).

$[\text{natGa}]$ Ga-NODAGA-xy-TPP Trifluoroacetate ( $[\text{natGa}]$ Ga4a)

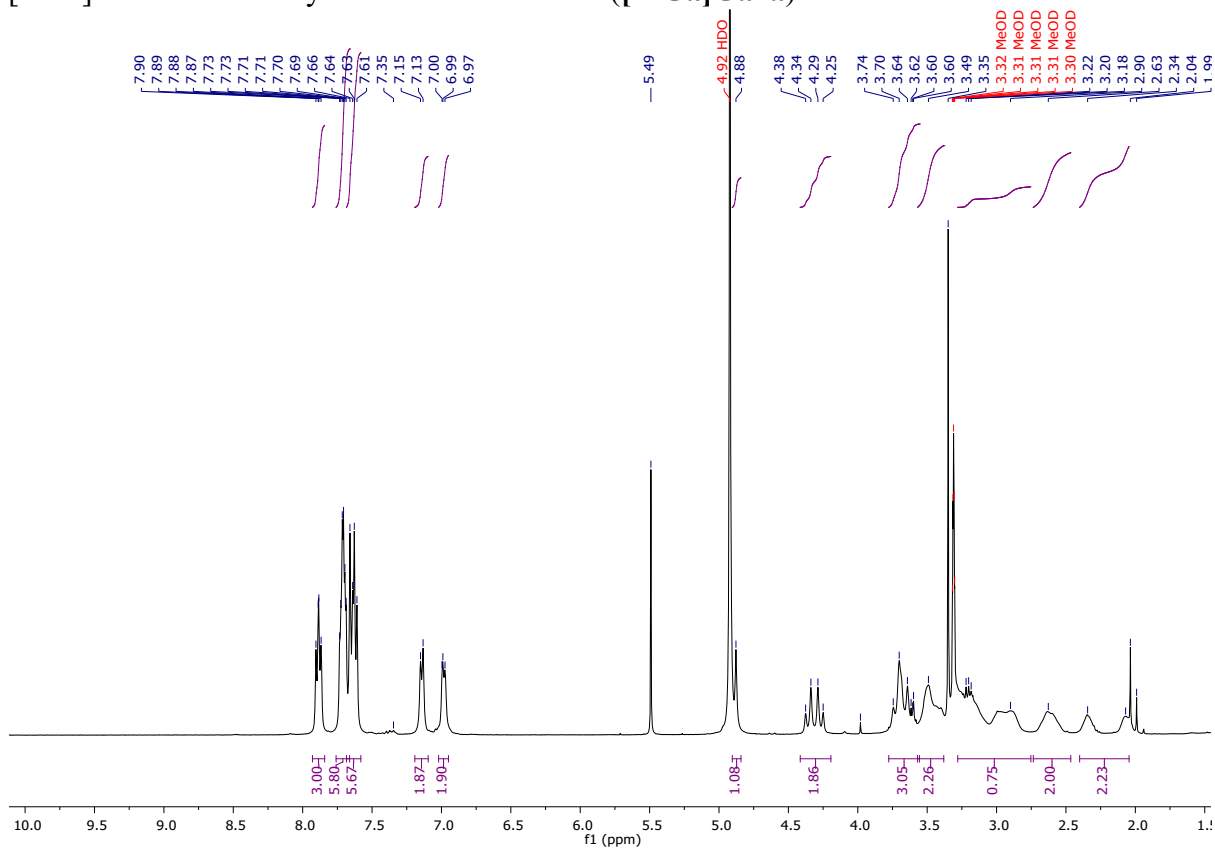

Figure S28:  $^1\text{H}$  NMR spectrum (MeOD, 400 MHz, 298 K).



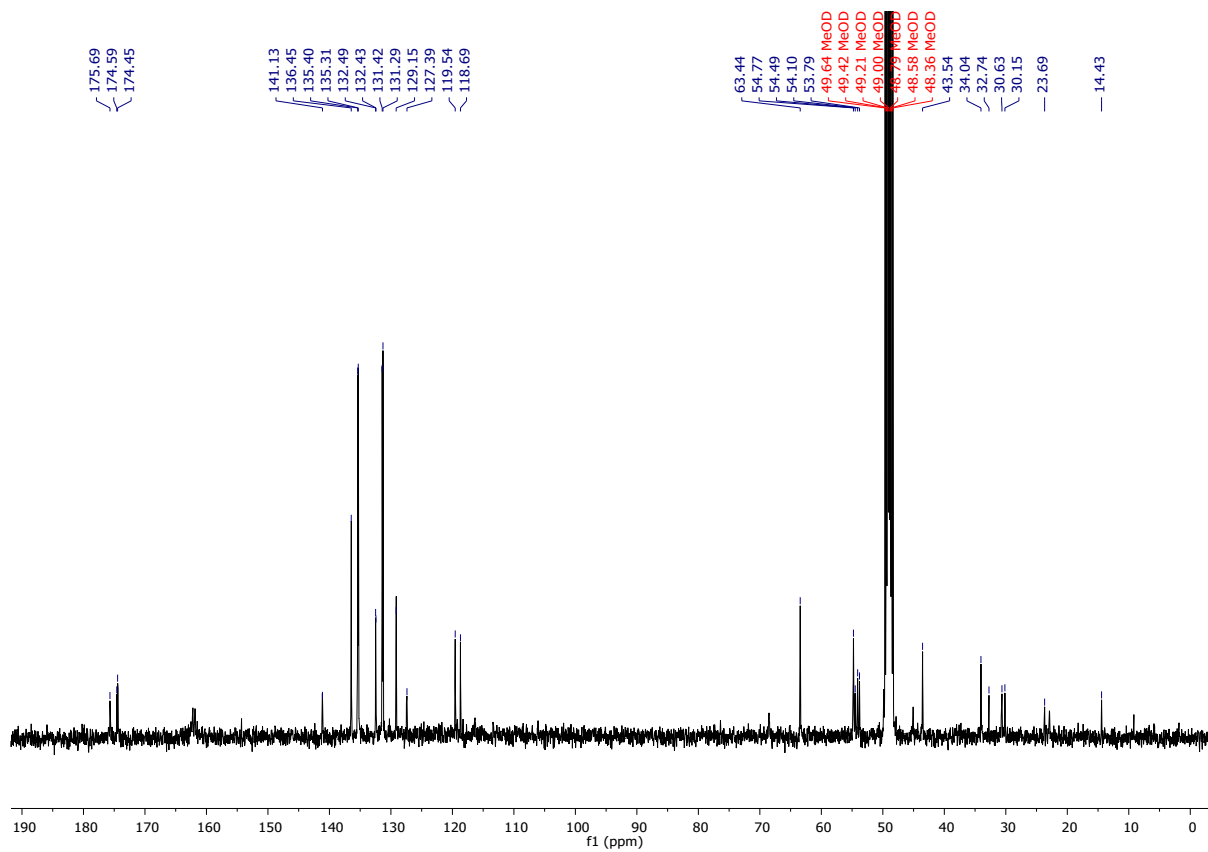

Figure S29:  $^{13}\text{C}\{^1\text{H}\}$  NMR spectrum (MeOD, 100 MHz, 298 K).

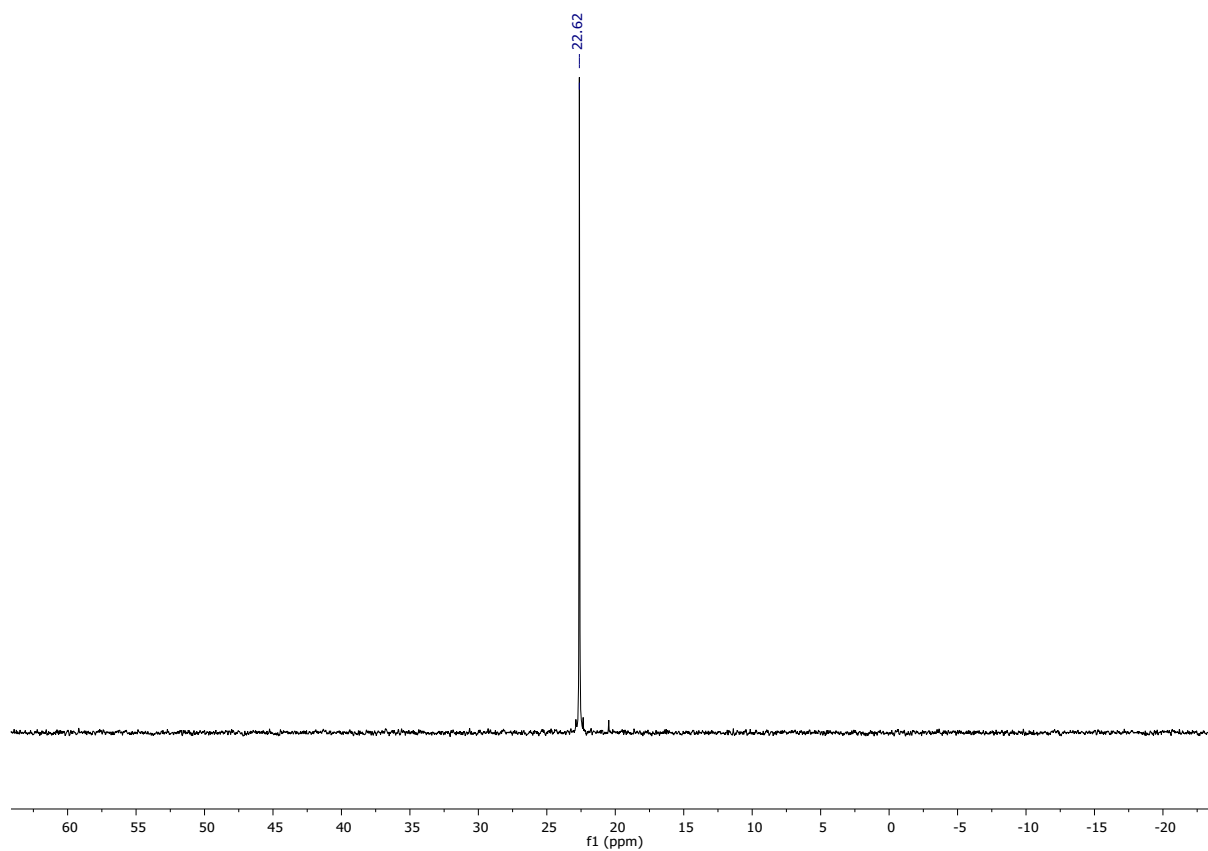

Figure S30:  $^{31}\text{P}\{^1\text{H}\}$  NMR spectrum (MeOD, 162 MHz, 298 K).

[<sup>nat</sup>Ga]Ga-NODAGA-xy-TTP Trifluoroacetate ([<sup>nat</sup>Ga]Ga4b)

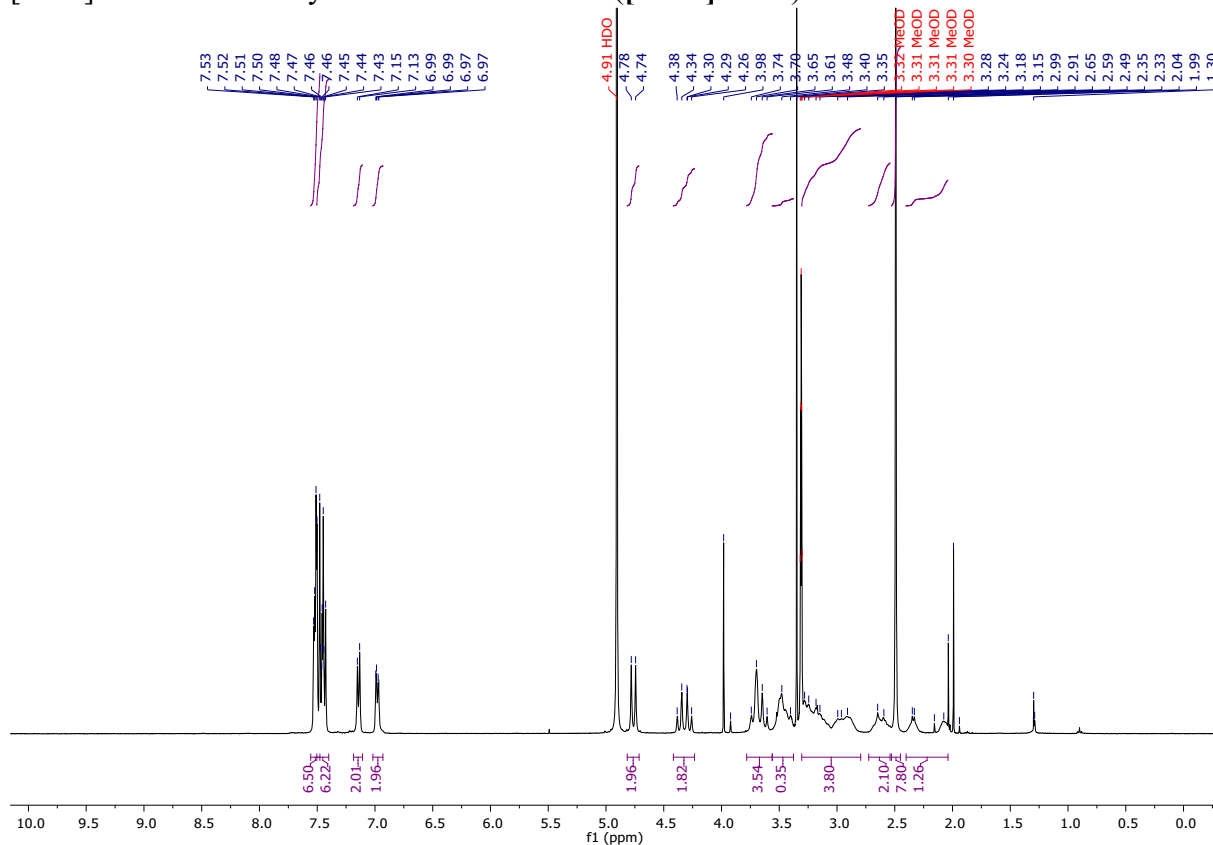

Figure S31: <sup>1</sup>H NMR spectrum (MeOD, 400 MHz, 298 K).

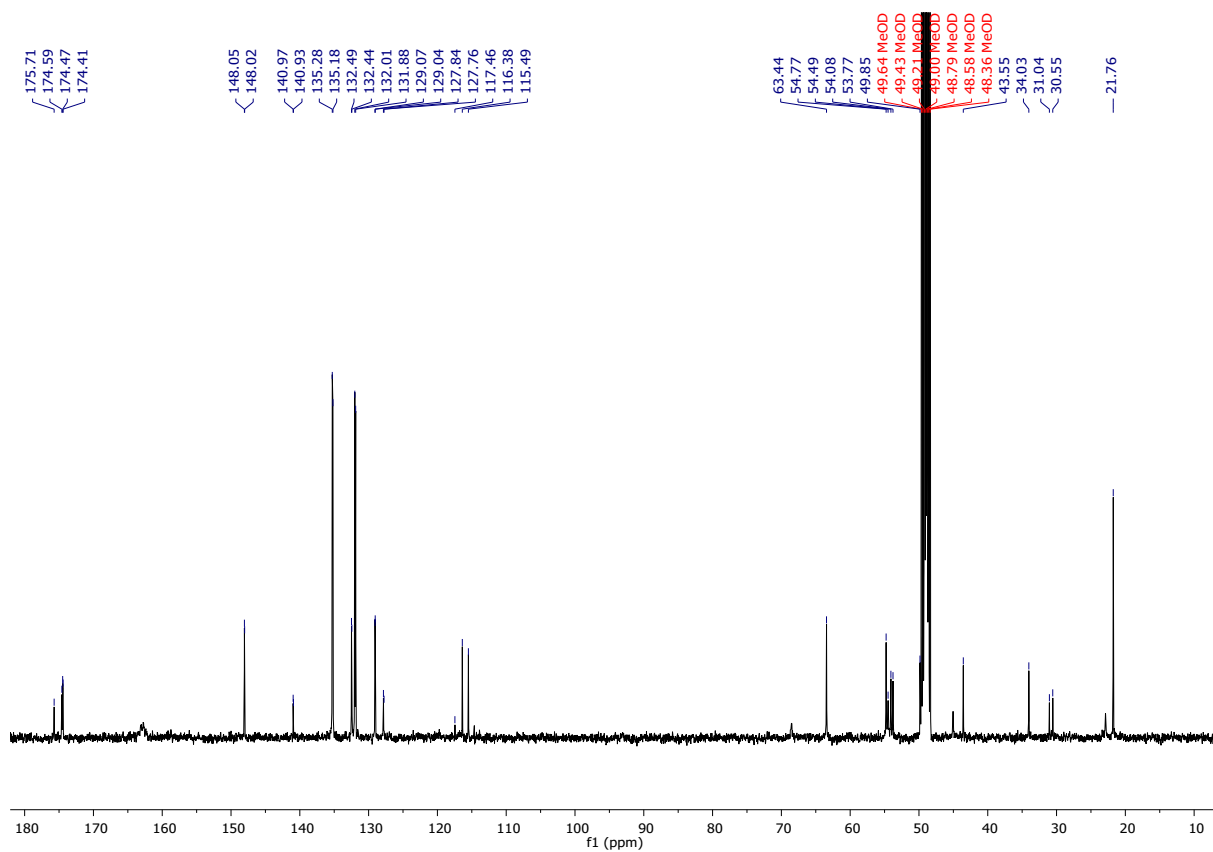

Figure S32: <sup>13</sup>C {<sup>1</sup>H} NMR spectrum (MeOD, 100 MHz, 298 K).

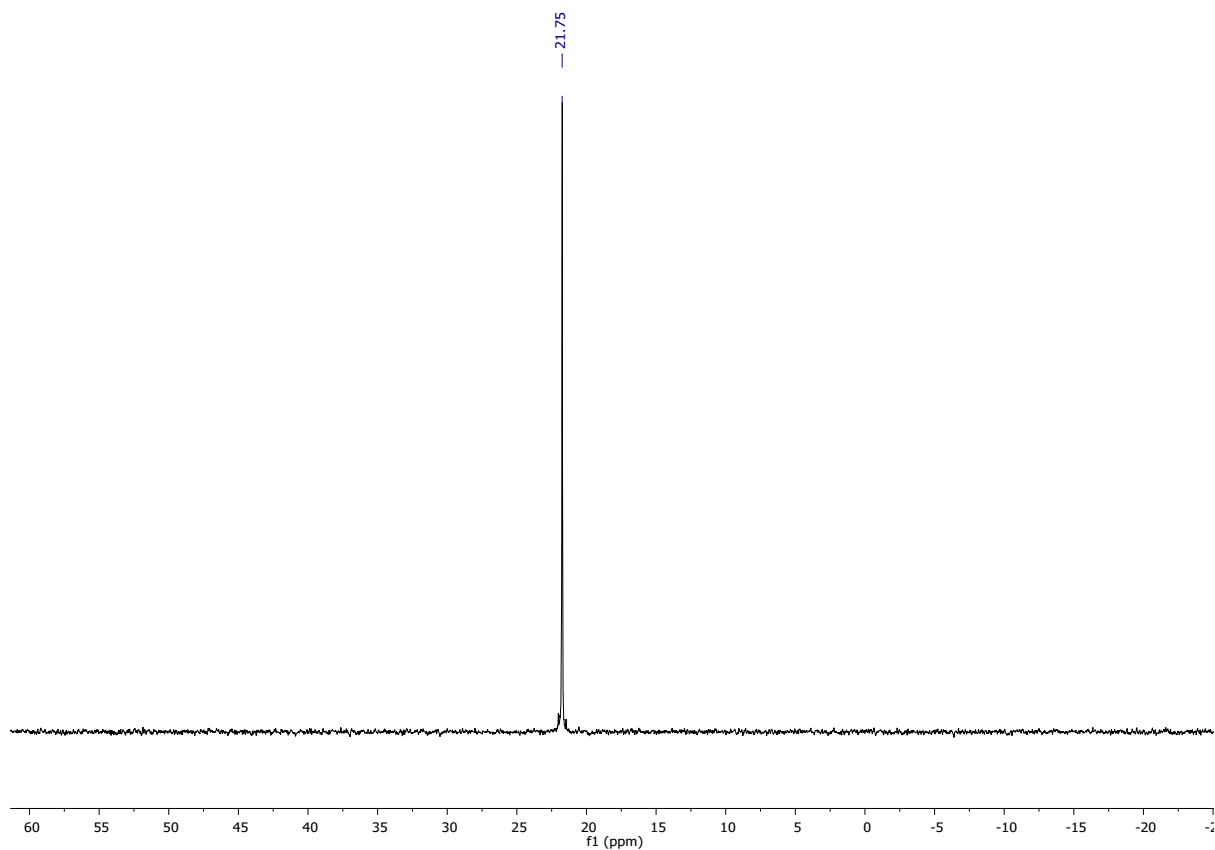

Figure S33:  $^{31}\text{P}\{^1\text{H}\}$  NMR spectrum (MeOD, 162 MHz, 298 K).

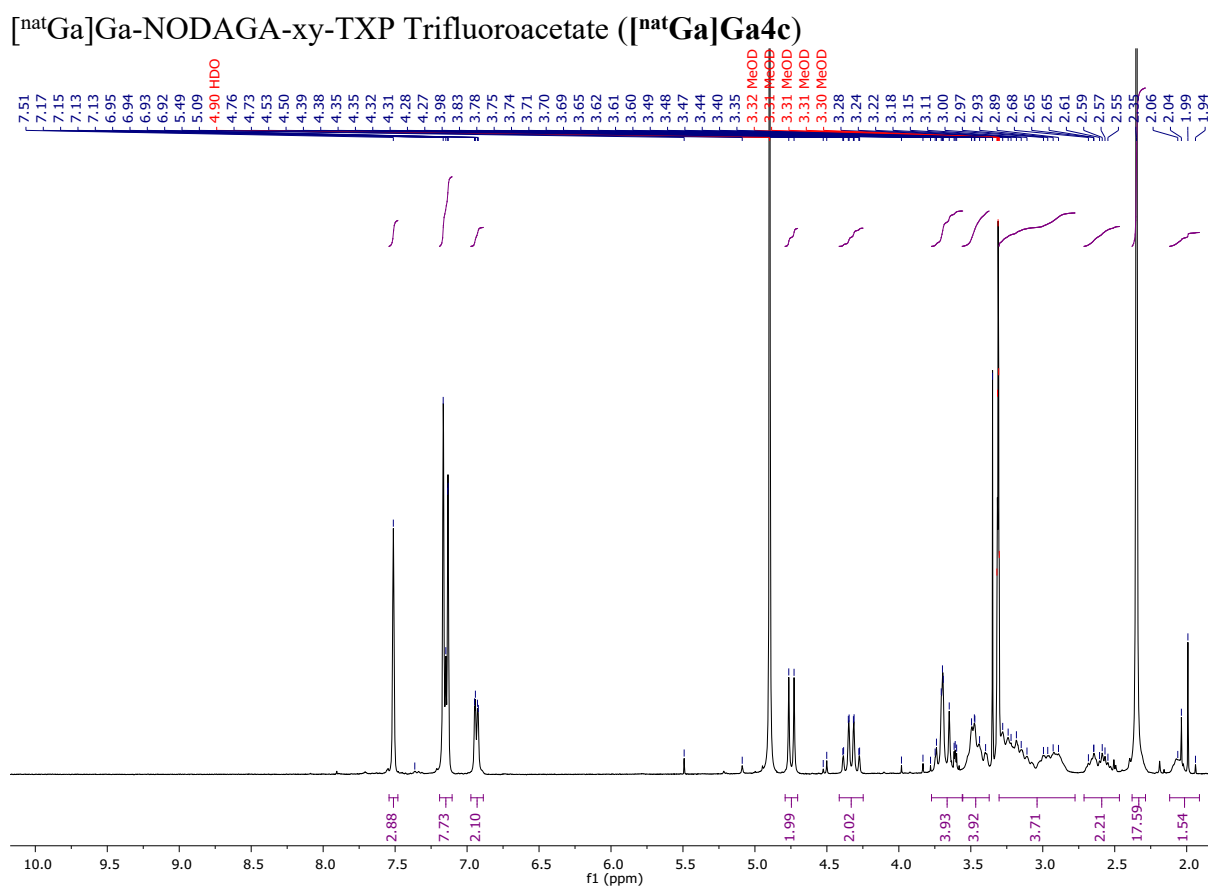

Figure S34:  $^1\text{H}$  NMR spectrum (MeOD, 400 MHz, 298 K).

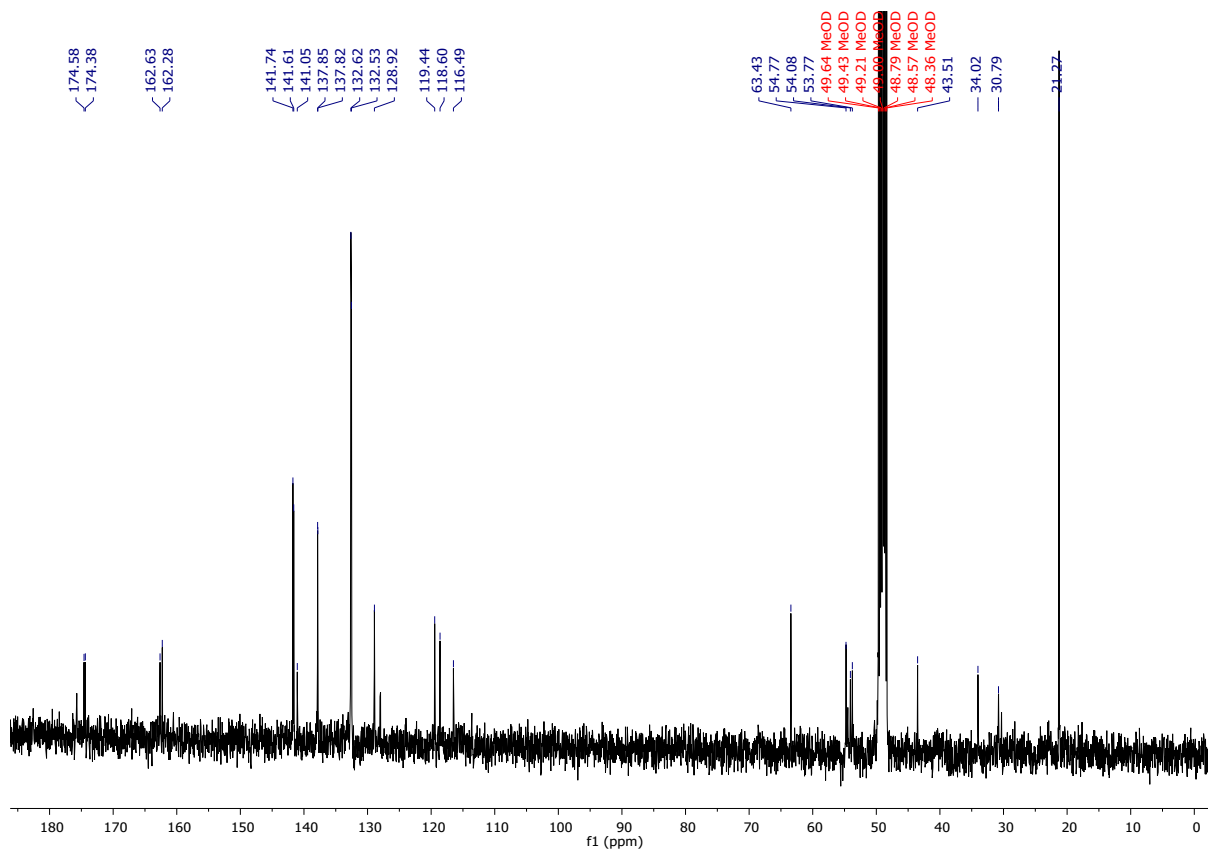

Figure S35:  $^{13}\text{C}\{^1\text{H}\}$  NMR spectrum (MeOD, 100 MHz, 298 K).

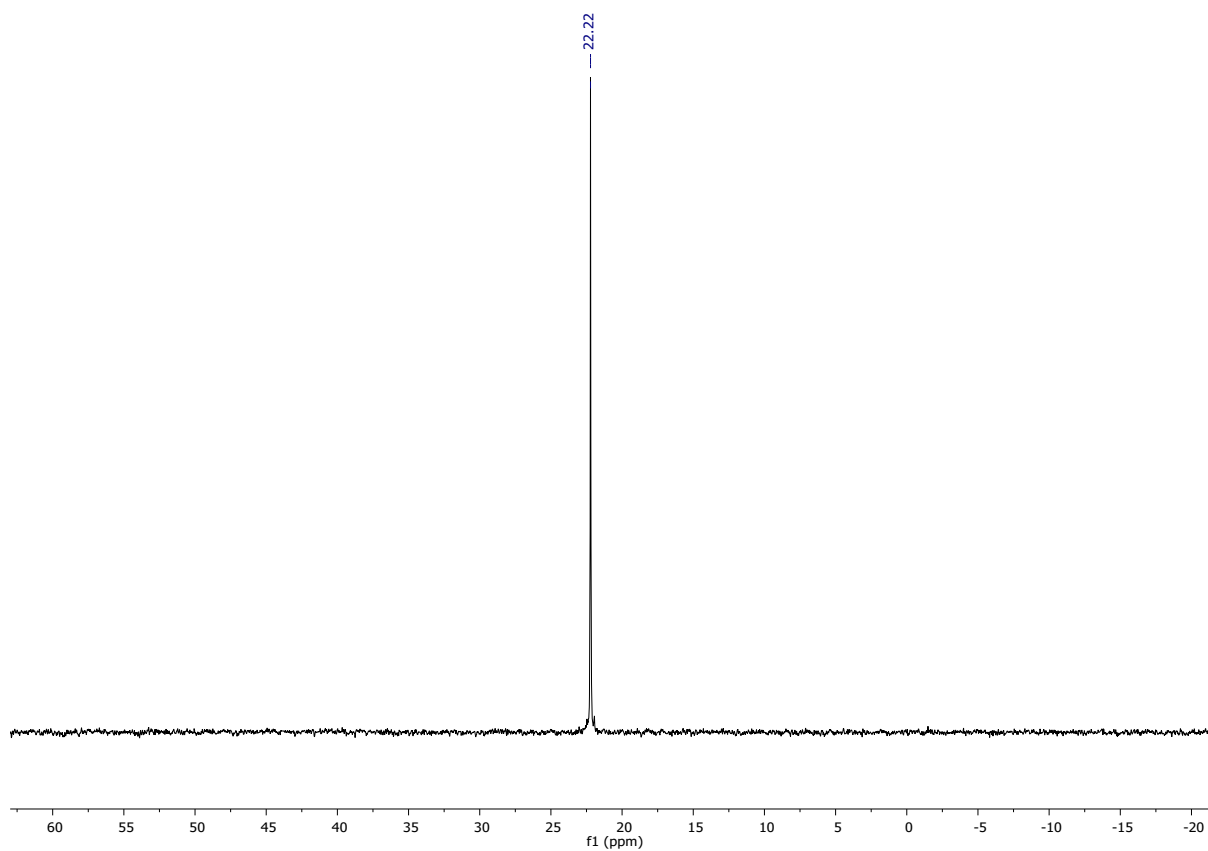

Figure S36:  $^{31}\text{P}\{^1\text{H}\}$  NMR spectrum (MeOD, 162 MHz, 298 K).

## iTLC Analysis

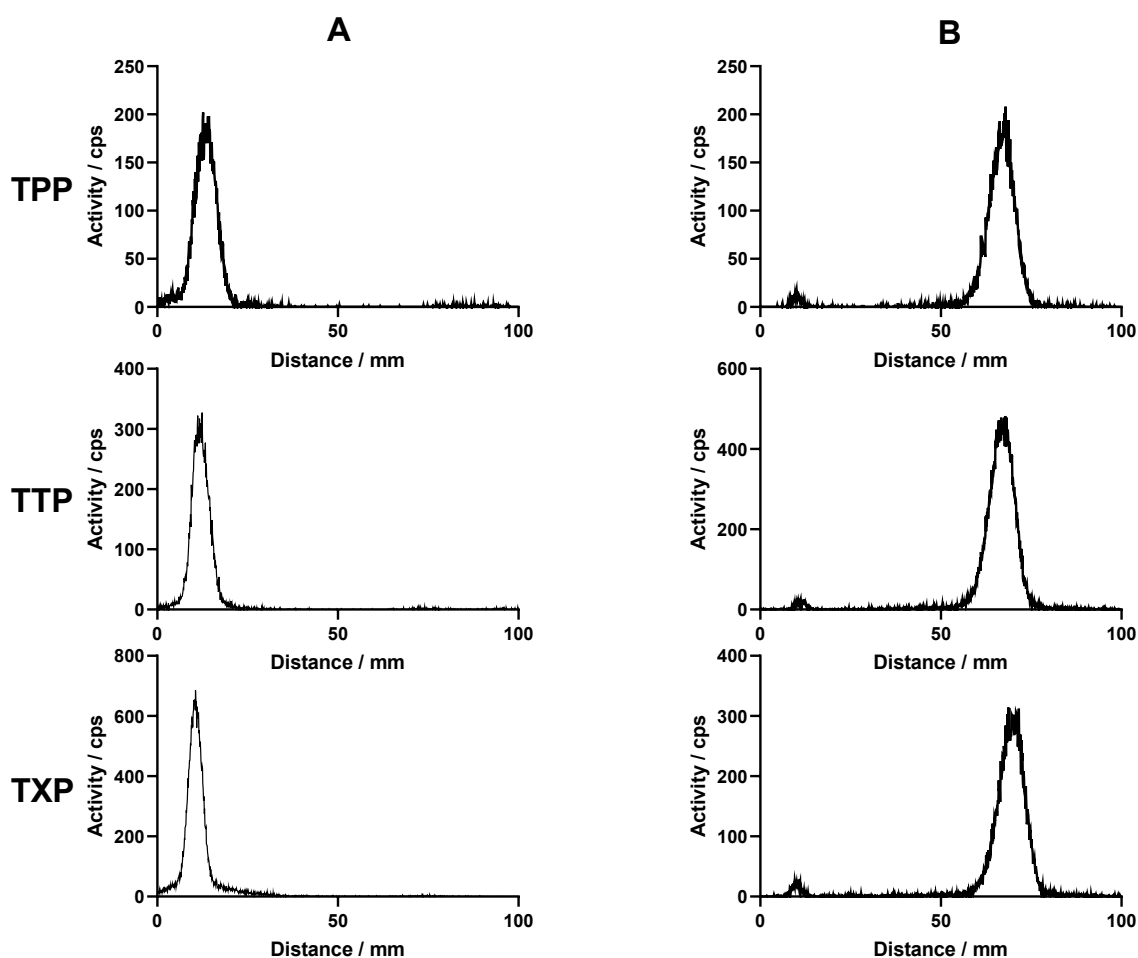

Figure S37: iTLC traces of [<sup>68</sup>Ga]Ga-NODAGA-xy-TPP, [<sup>68</sup>Ga]Ga-NODAGA-xy-TTP, [<sup>68</sup>Ga]Ga-NODAGA-xy-TXP. (A) Mobile phase: 0.1 M disodium EDTA. (B) Mobile phase: 2.0 M NH<sub>4</sub>OAc:MeOH (1:1).

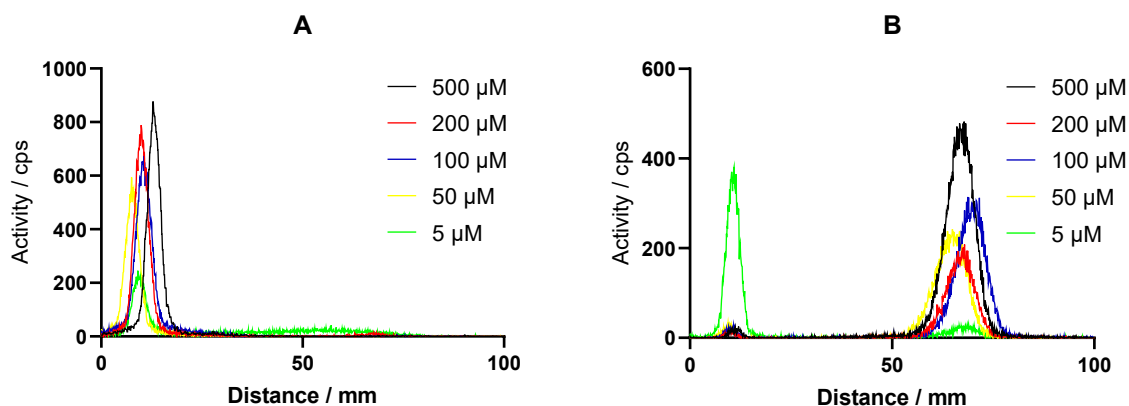

Figure S38: Dilution study iTLC traces of [<sup>68</sup>Ga]Ga-NODAGA-xy-TXP at ligand concentrations of 500 μM (black), 200 μM (red), 100 μM (blue), 50 μM (yellow) and 5 μM (green). (A) Mobile phase: 0.1 M disodium EDTA. (B) Mobile phase: 2.0 M NH<sub>4</sub>OAc:MeOH (1:1).

## RadioHPLC Analysis

[<sup>68</sup>Ga]Ga-NODAGA-xy-TPP ([<sup>68</sup>Ga]Ga4a)

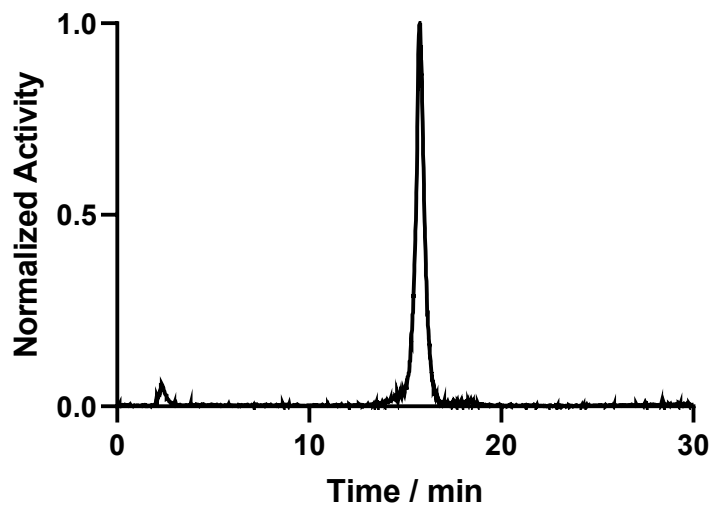

Figure S39: RadioHPLC trace of [<sup>68</sup>Ga]Ga-NODAGA-xy-TPP. Eluent gradient: water (0.1 % TFA) (A) and MeCN (0.1 % TFA) (B) (95 % A for 5 min, 0 – 95 % B in A for 20 min, 95 % B for 5 min; flow rate 1 mL min<sup>-1</sup>).

[<sup>68</sup>Ga]Ga-NODAGA-xy-TTP ([<sup>68</sup>Ga]Ga4b)

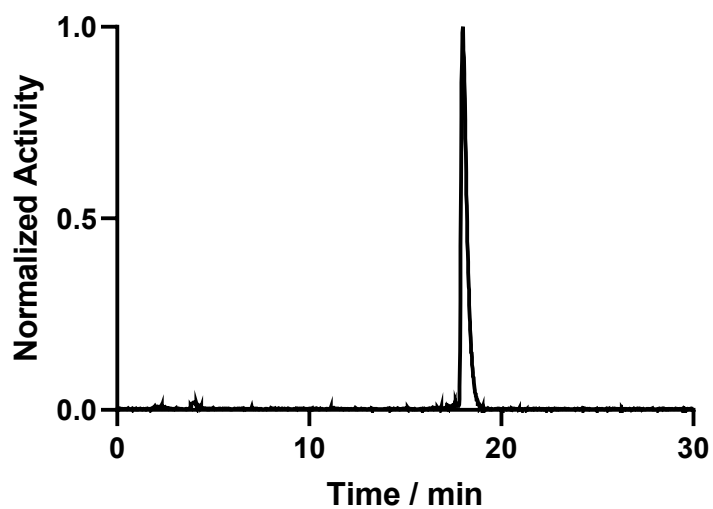

Figure S40: RadioHPLC trace of [<sup>68</sup>Ga]Ga-NODAGA-xy-TTP. Eluent gradient as described for Figure S39.

[<sup>68</sup>Ga]Ga-NODAGA-xy-TXP ([<sup>68</sup>Ga]Ga4c)

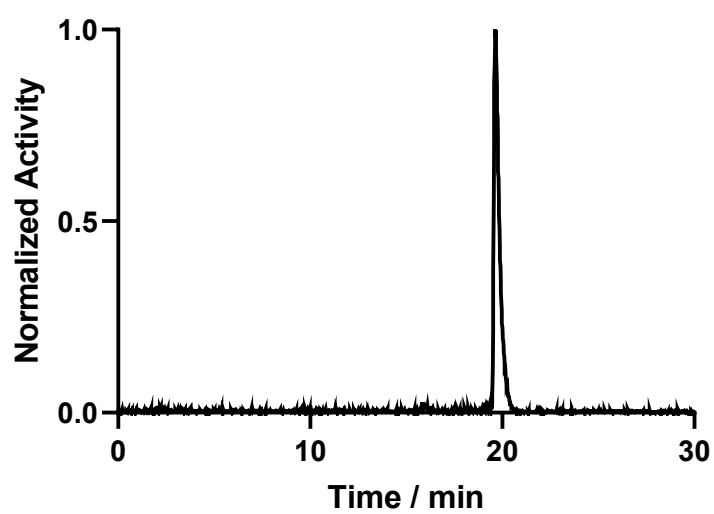

Figure S41: RadioHPLC trace of [<sup>68</sup>Ga]Ga-NODAGA-xy-TXP. Eluent gradient as described for Figure S39.

# Langendorff Isolated Heart Perfusion

## Stability Study

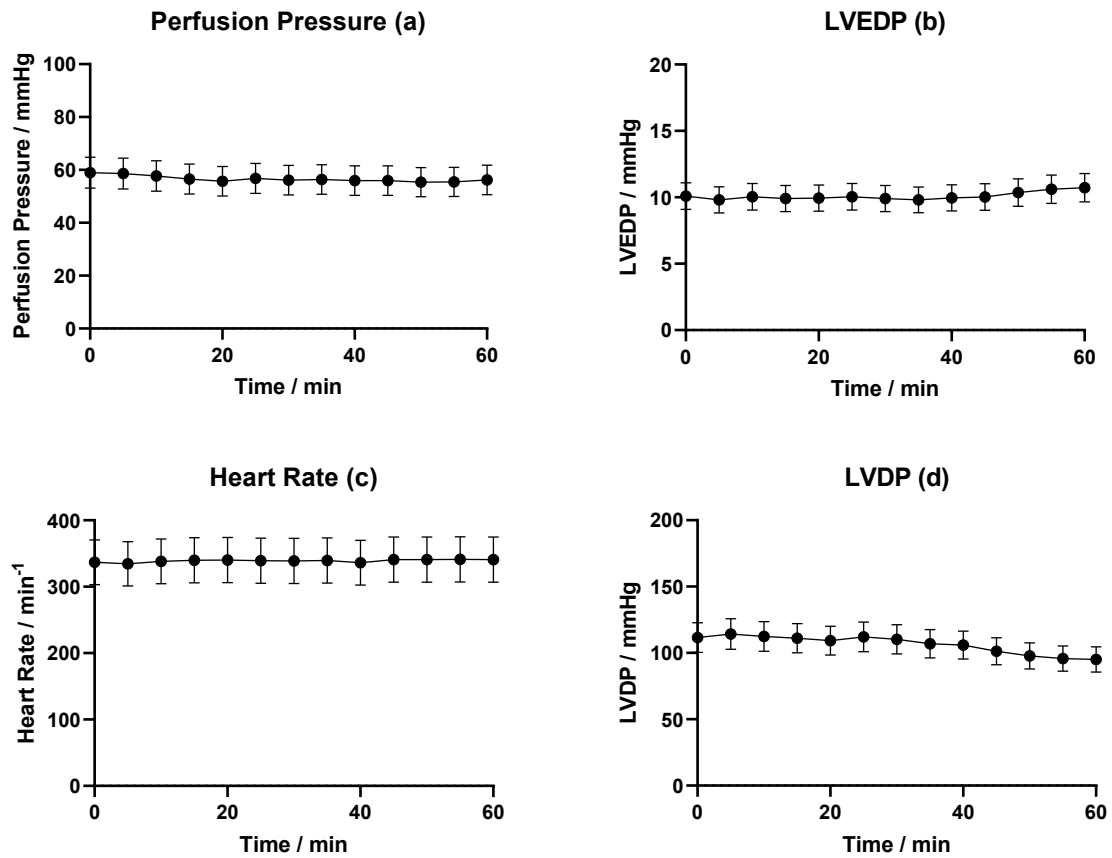

Figure S42: Stability study performed to generate exclusion criteria for the function of isolated perfused hearts. **(a)** perfusion pressure, **(b)** left ventricular end-diastolic pressure (LVEDP), **(c)** heart rate, **(d)** left ventricular developed pressure (LVDP). Perfusion pressure was measured by a pressure transducer connected to the arterial line, whilst LVEDP, LVDP and heart rate were calculated as a function of the left ventricular pressure measured by an isovolumetric balloon connected to a pressure transducer inserted into the left ventricle. Hearts were electrically paced at 340 min<sup>-1</sup>. Data represents (n = 6) ± SD.



## Effects of 600 nM CCCP Infusion on Haemodynamic Parameters

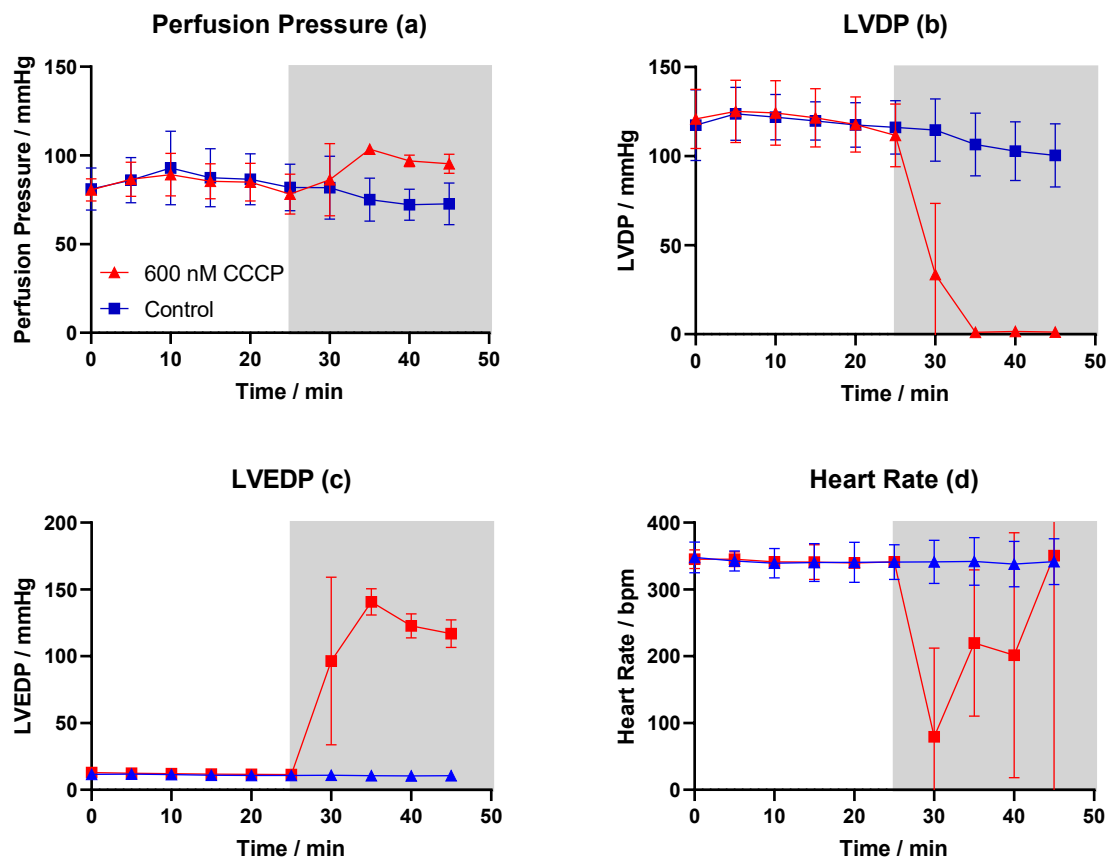

Figure S43: Haemodynamic parameters for control hearts undergoing normal function for 45 minutes ( $n = 6$ , blue) and hearts undergoing normal function for 25 minutes followed by infusion with 600 nM CCCP for 20 minutes ( $n = 6$ , red). (a) perfusion pressure, (b) LVDP, (c) LVEDP, (d) heart rate. Data represents mean  $\pm$  SD.

Triple  $\gamma$ -Detector System Raw Data for [ $^{99m}\text{Tc}$ ]Tc-sestaMIBI Using the Two-Injection Protocol

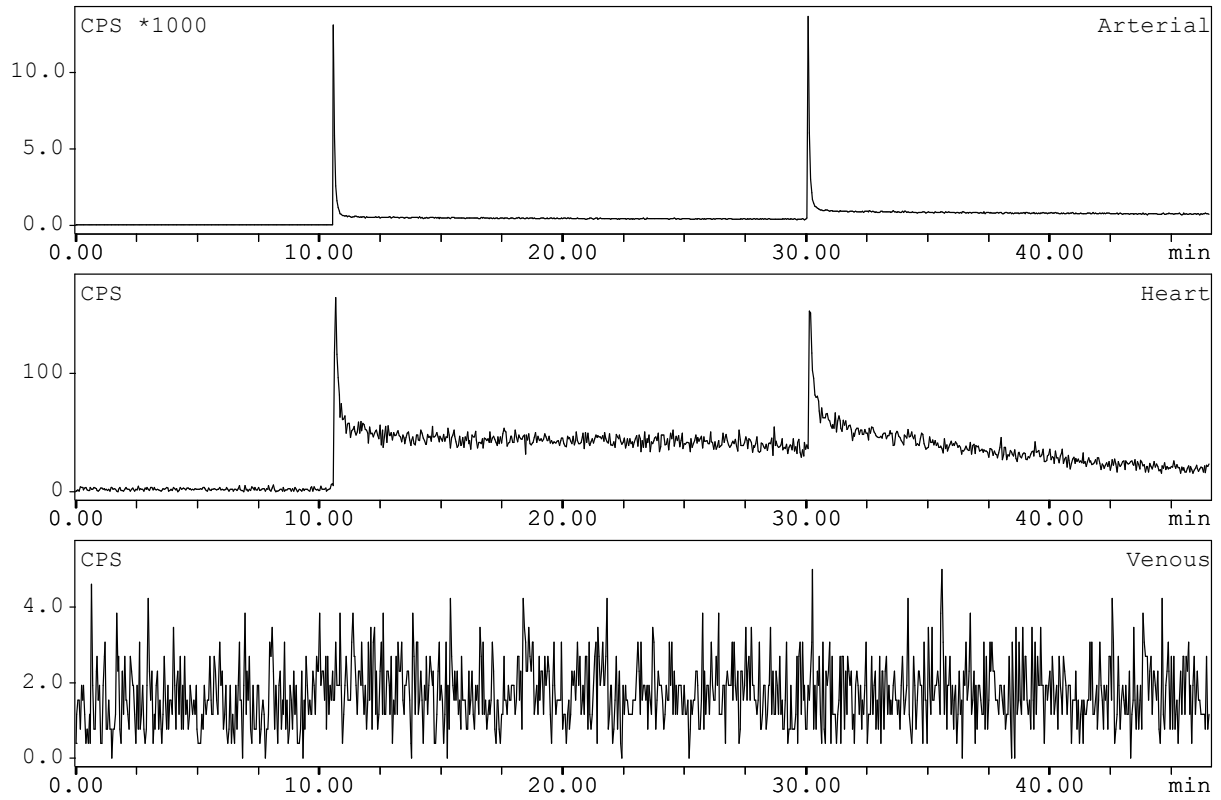

Figure S44: Experiment 1. There was an issue with the venous detector and as such an accurate venous trace could not be obtained.

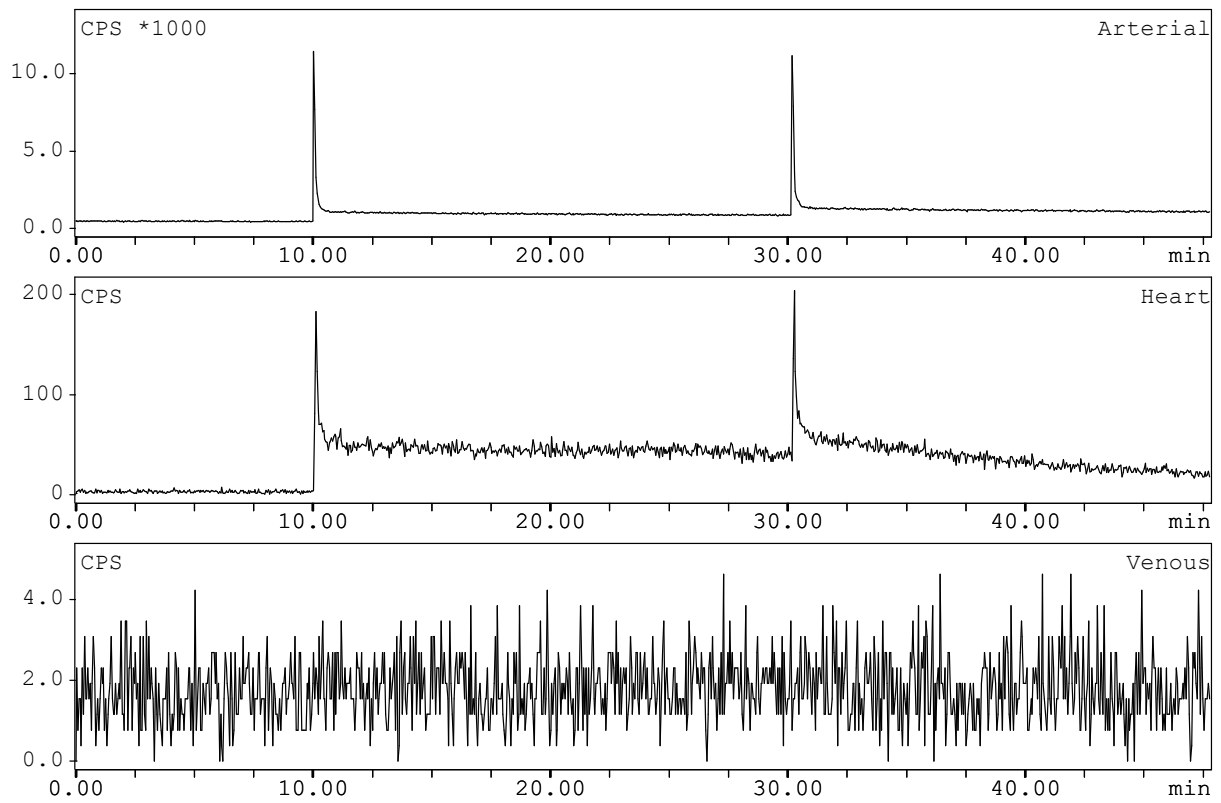

Figure S45: Experiment 2.

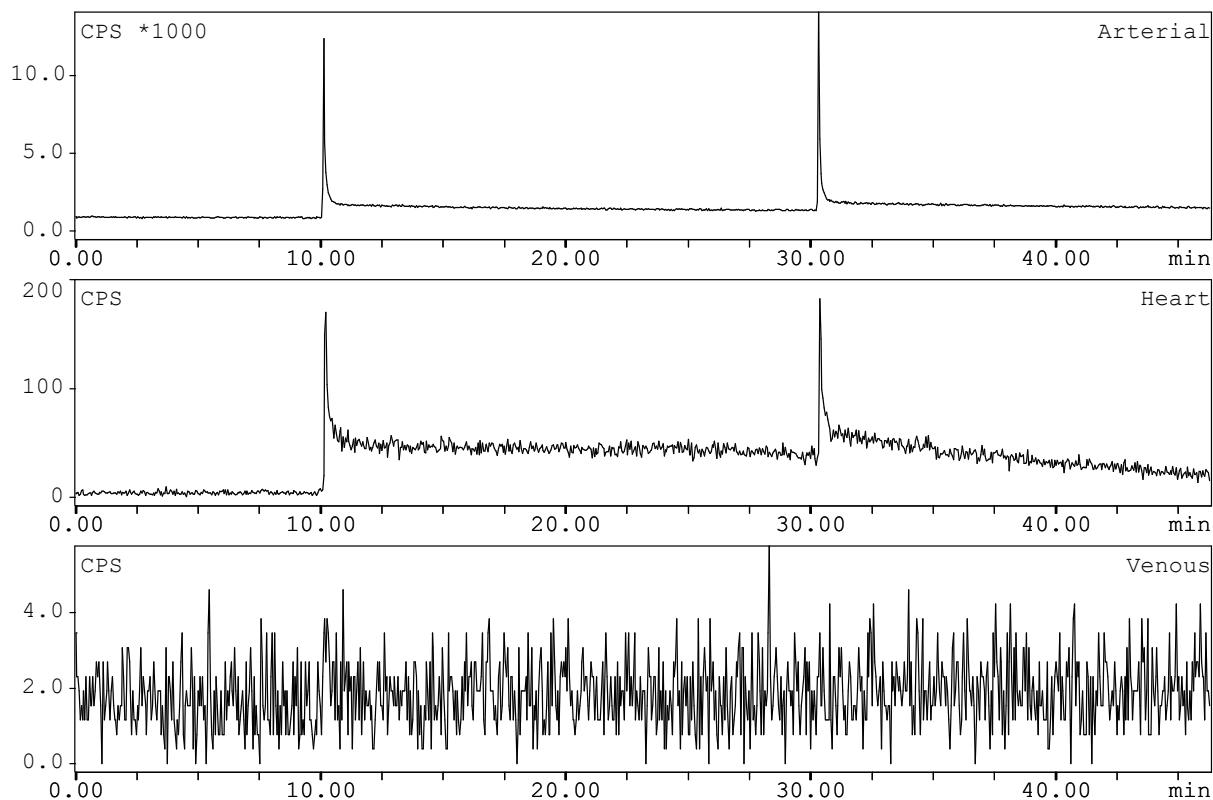

Figure S46: Experiment 3.

Triple  $\gamma$ -Detector System Raw Data for [ $^{68}\text{Ga}$ ]Ga-NODAGA-xy-TXP ( $^{68}\text{Ga}$ ]Ga4c)

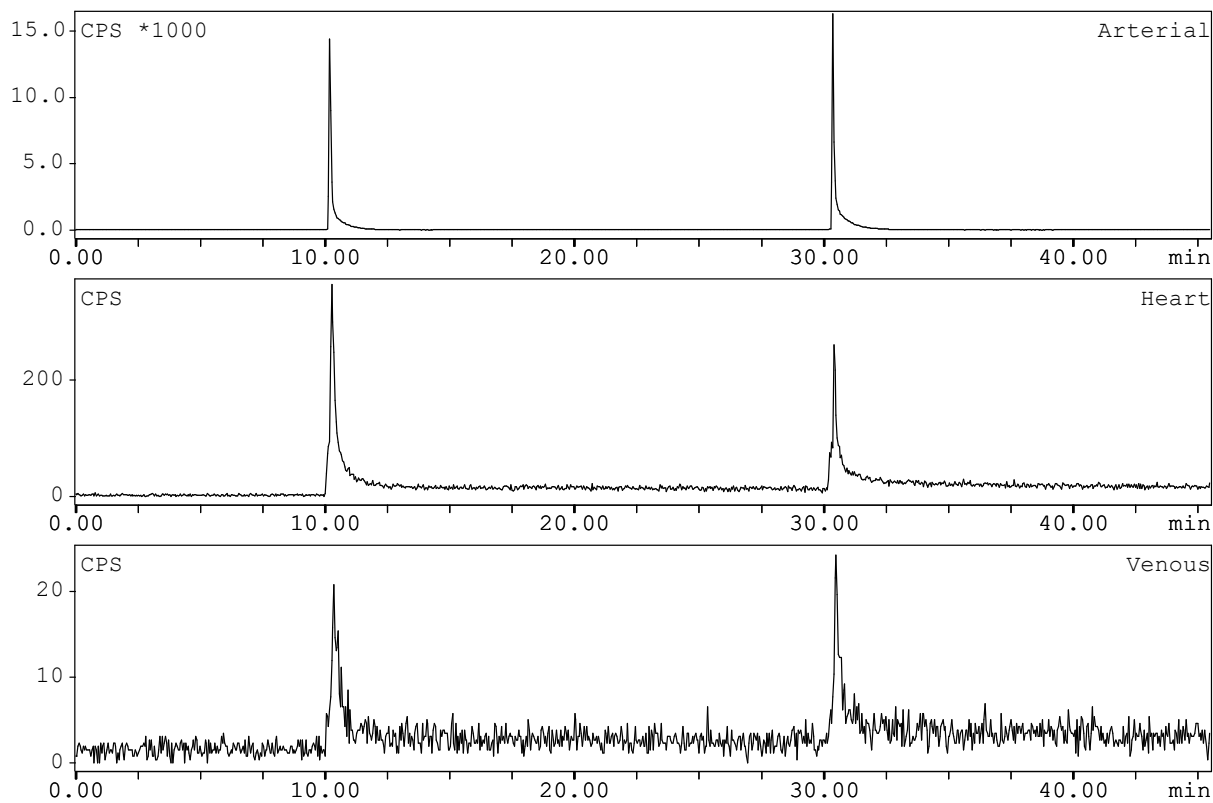

Figure S47: Experiment 1.

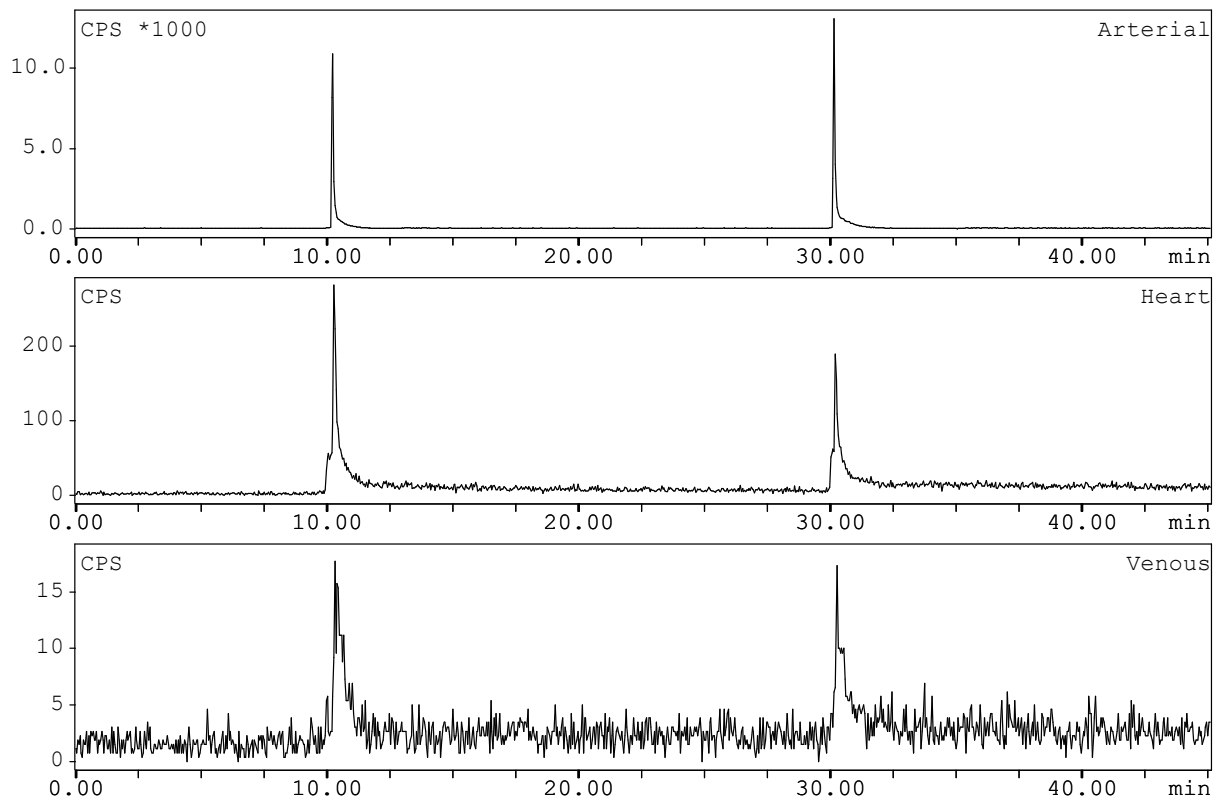

Figure S48: Experiment 2.

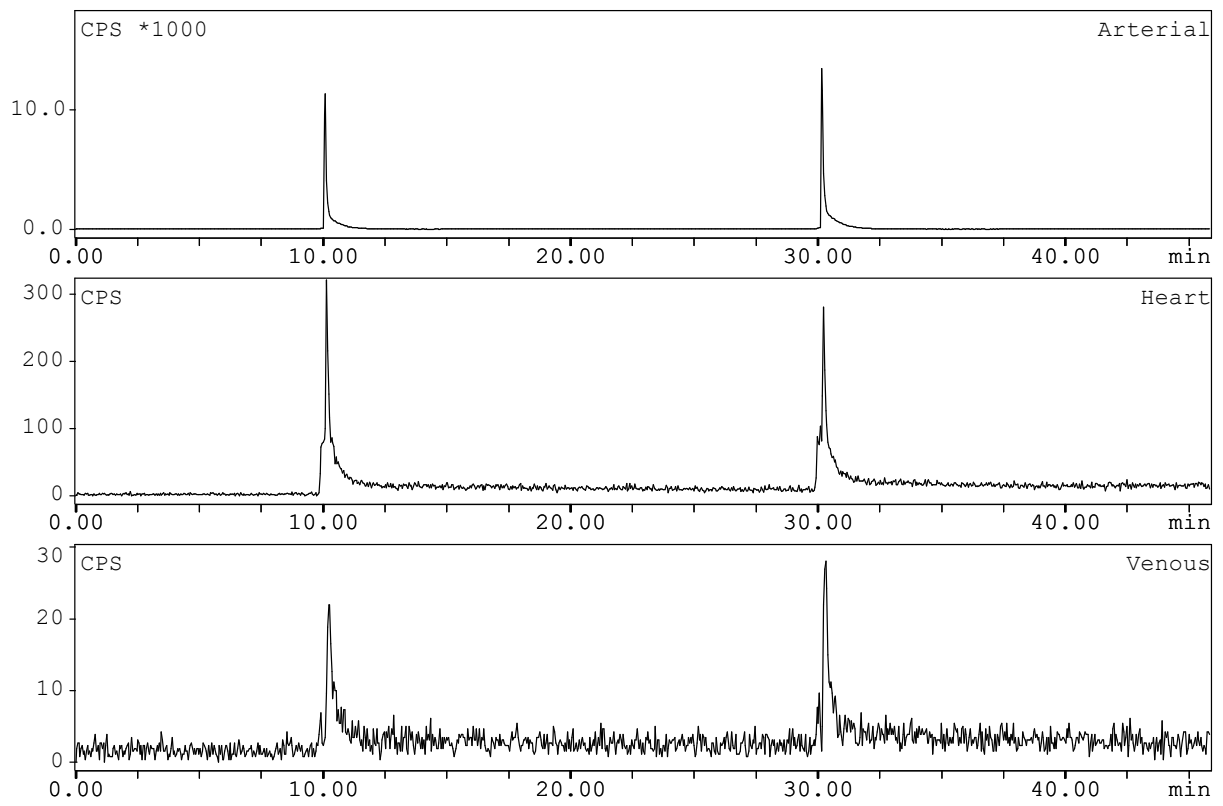

Figure S49: Experiment 3.

## DFT Calculations

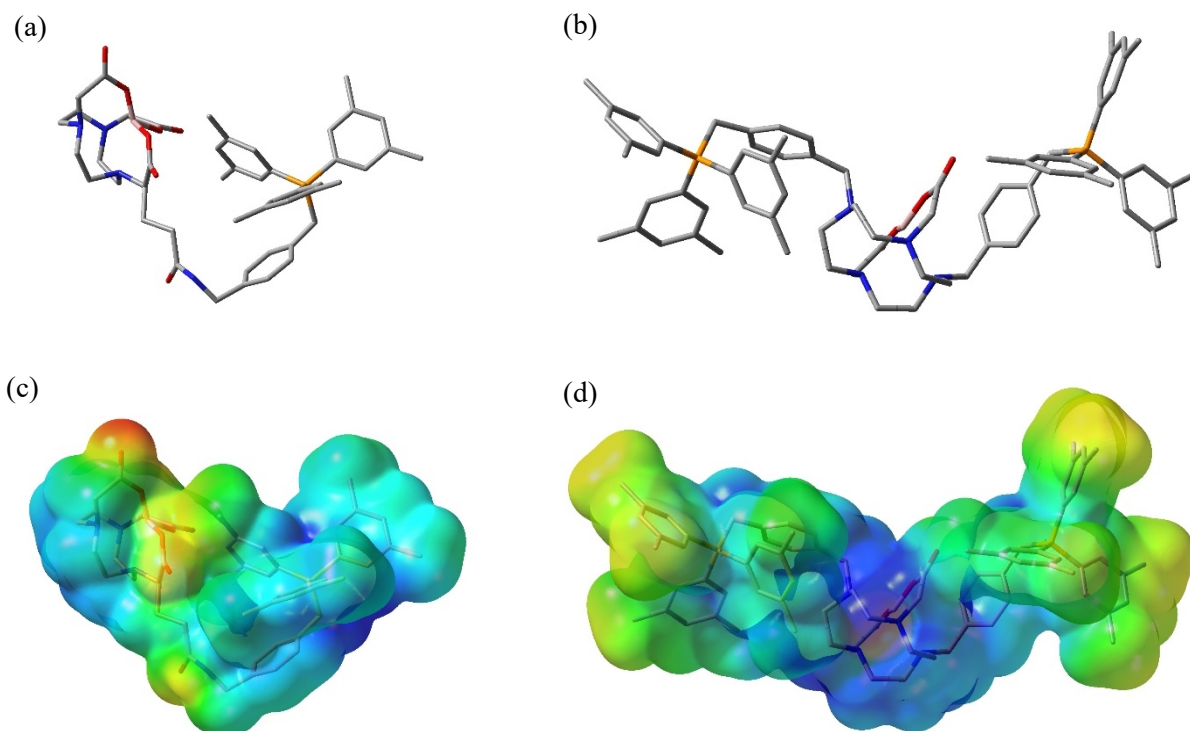

Figure S50: DFT optimised structures of (a)  $[\text{Ga}(\text{NODAGA-xy-TXP})]^+$  and (b)  $[\text{Ga}(\text{DO2A(-xy-TXP)}_2)]^{3+}$  with a hexacoordinated metal centre ( $\text{Ga}^{3+}$ ). Mapping of the electrostatic potentials of (c)  $[\text{Ga}(\text{NODAGA-xy-TXP})]^+$  and (d)  $[\text{Ga}(\text{DO2A(-xy-TXP)}_2)]^{3+}$  onto electron density surface; the MEP of (c) represents a maximum potential of 0.12 a.u. and minimum of -0.03 a.u. while the MEP of (d) represent a maximum potential of 0.25 a.u. and minimum of 0.10 a.u. (red to blue = negative to positive).
